# Supplementary material for: p53 promotes peroxisomal fatty acid β-oxidation to repress purine biosynthesis and mediate tumor suppression
Source: PubMed Central journal article supplement (PMC9905075; doi:10.1038/s41419-023-05625-2), 2023-02-07
Supplement: 41419_2023_5625_MOESM19_ESM.pdf [file 41419_2023_5625_MOESM19_ESM.pdf]

**Fig. 1f**

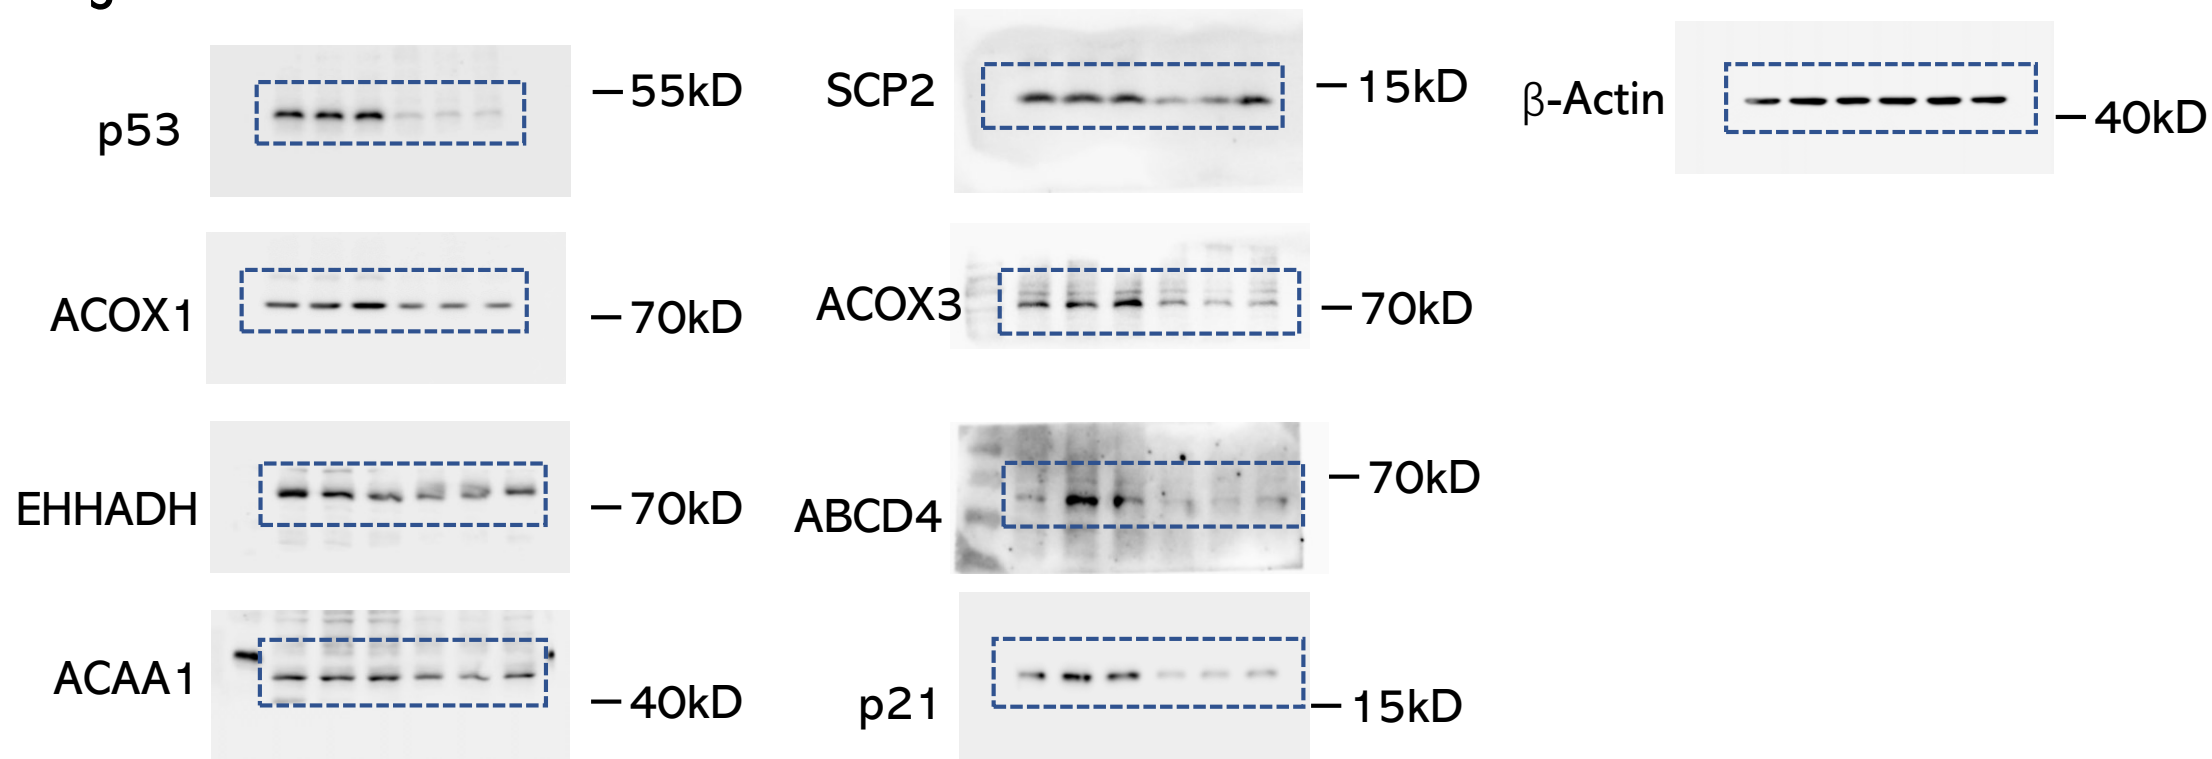

Fig. S1g

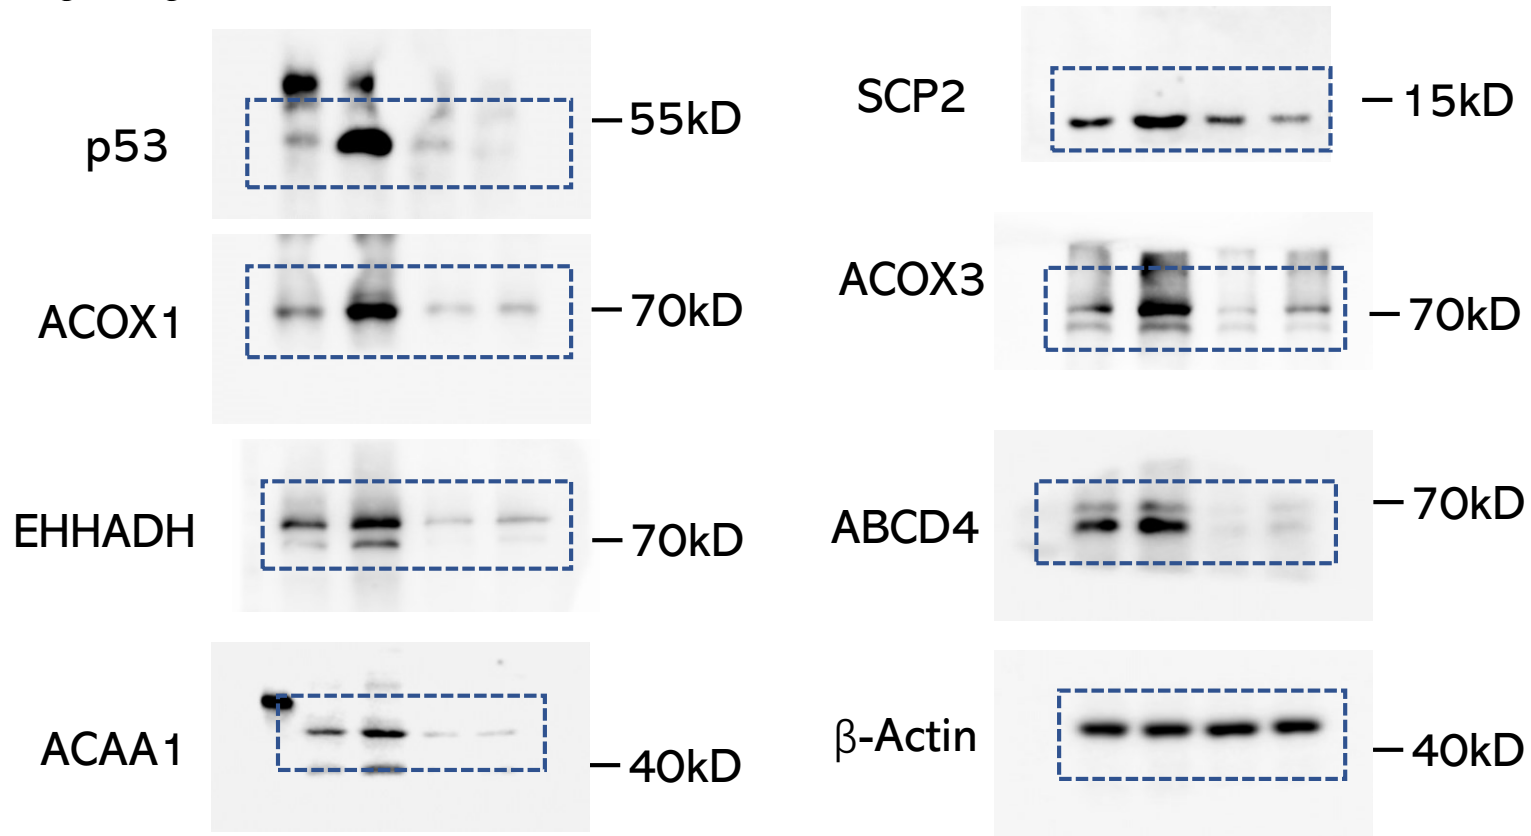

**Fig. S1g**

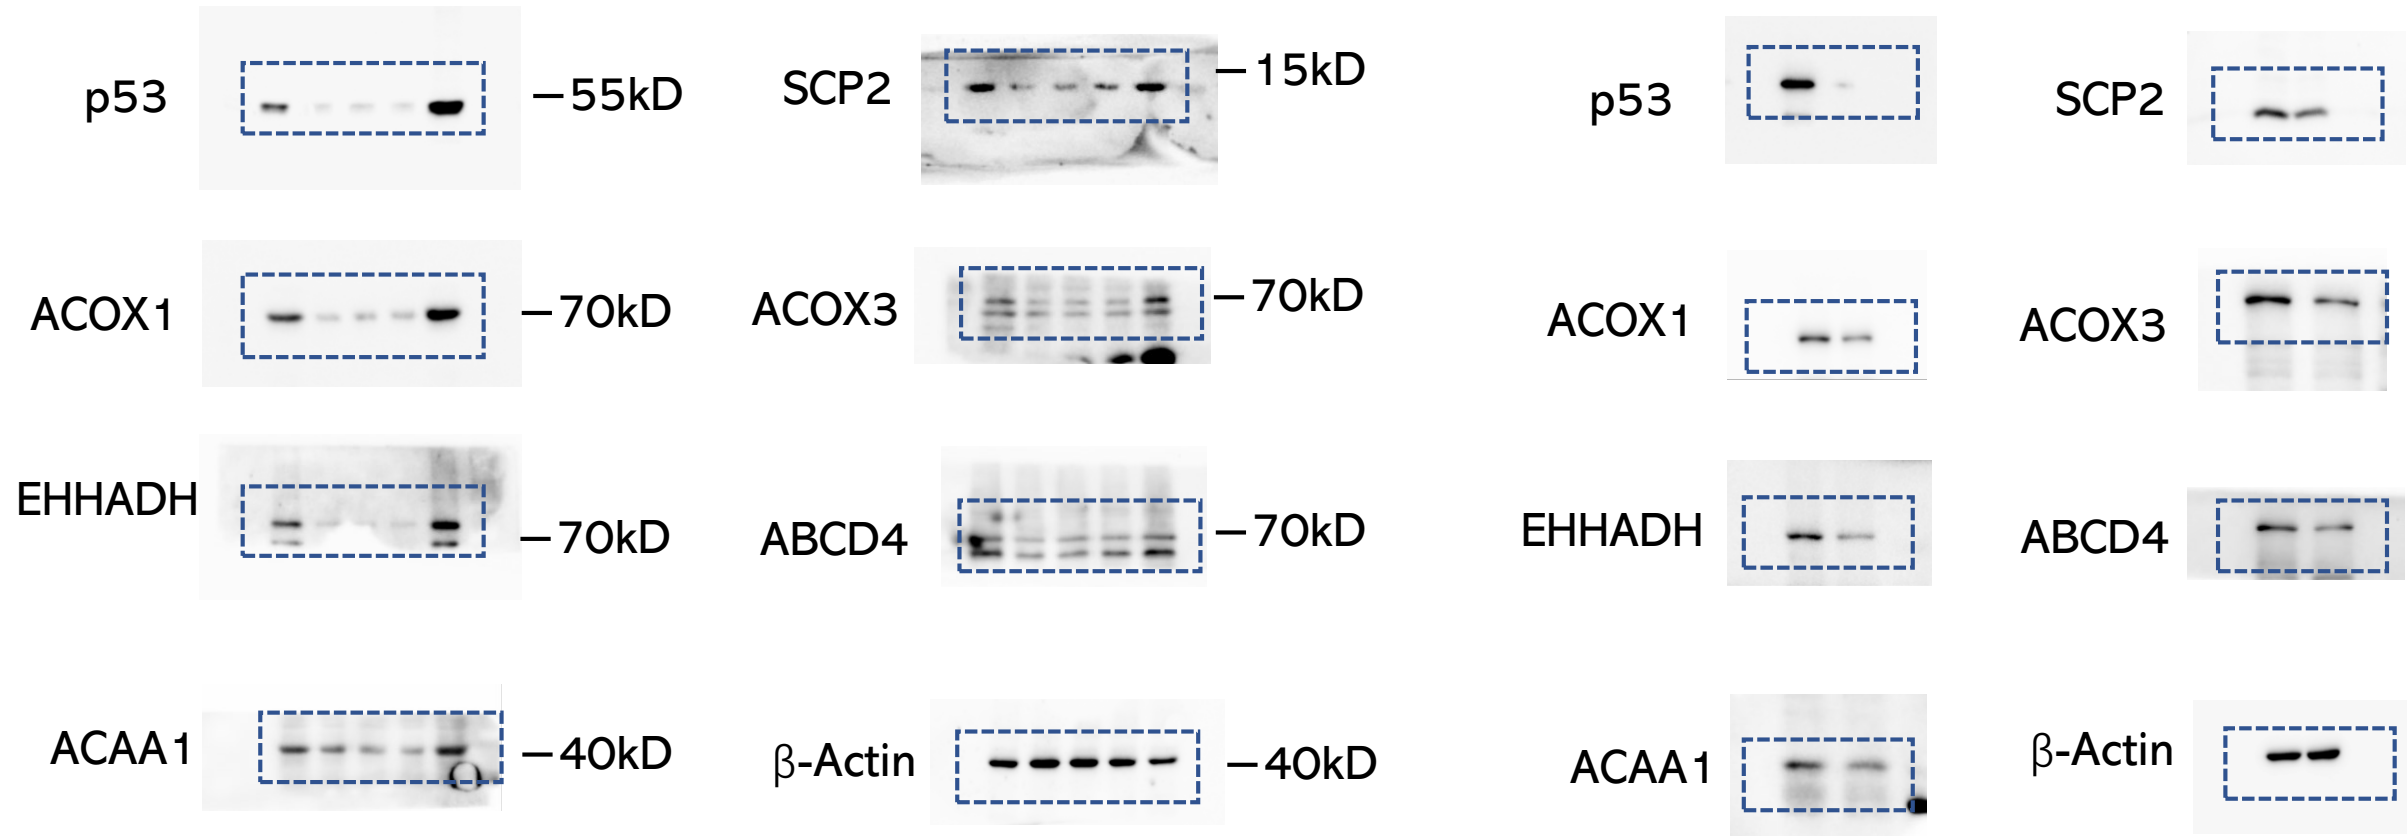

Fig. S1h

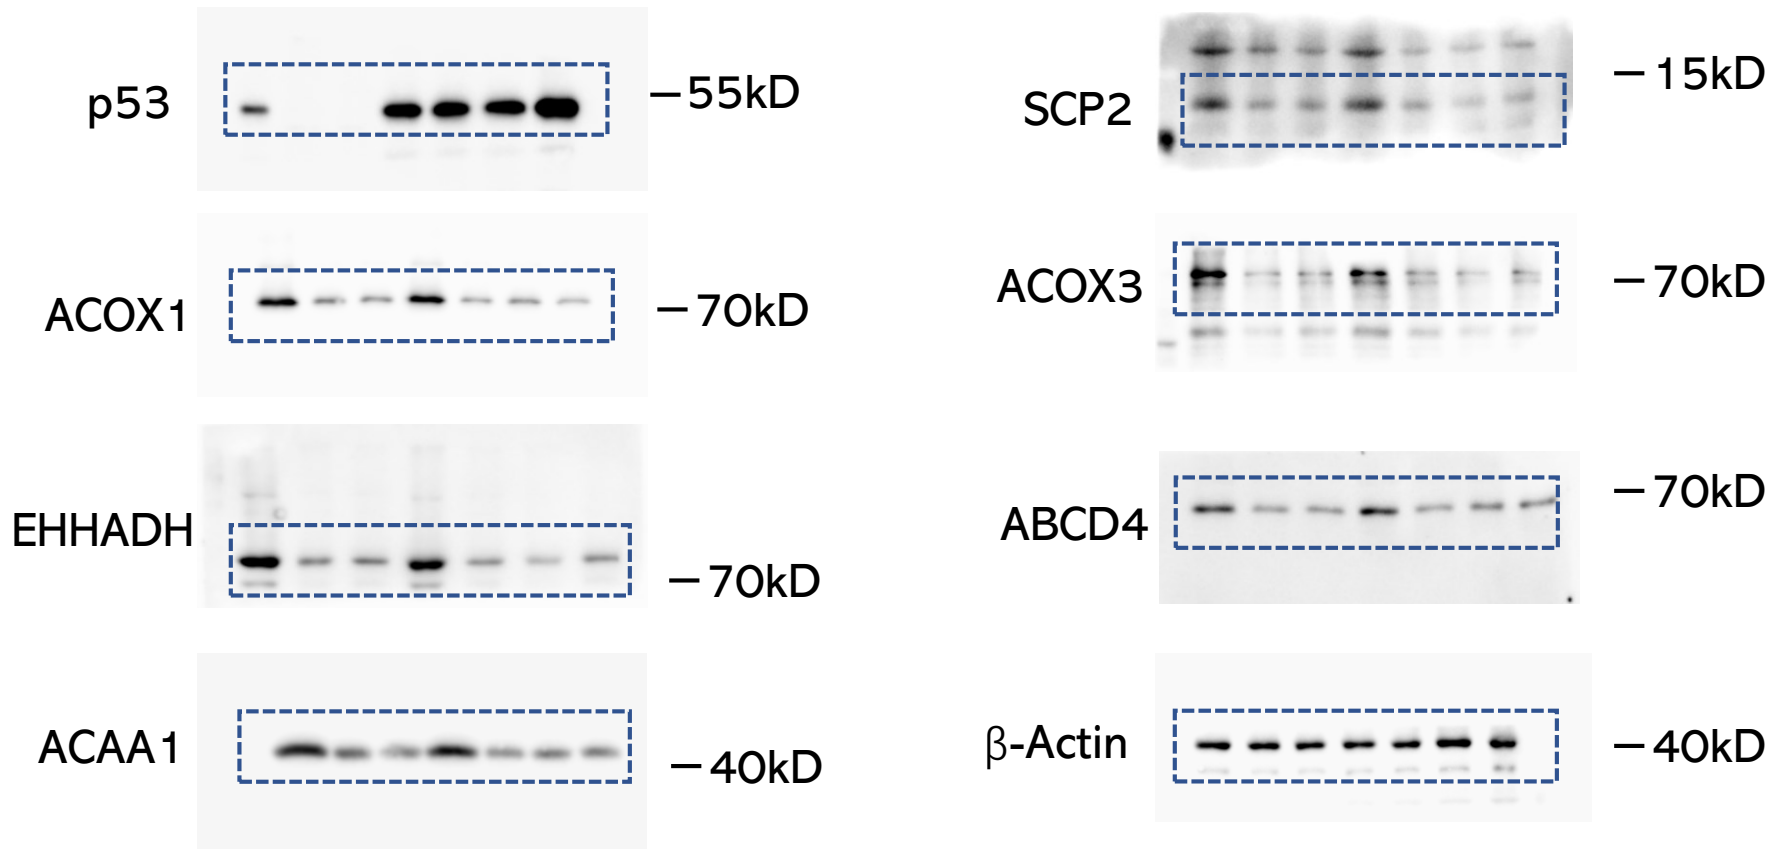

Fig. 2c

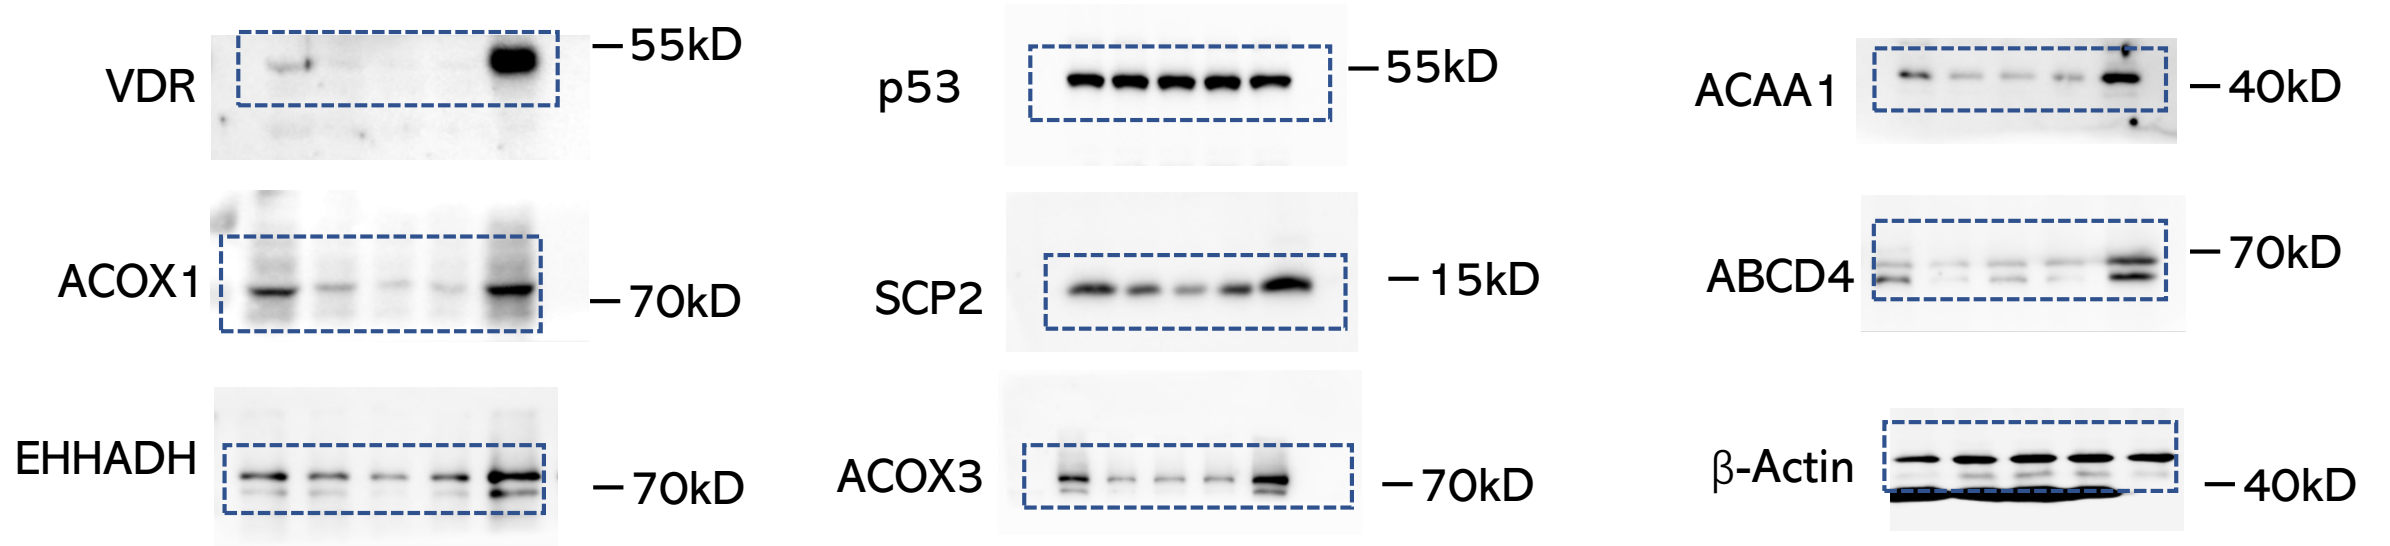

Fig. 2d

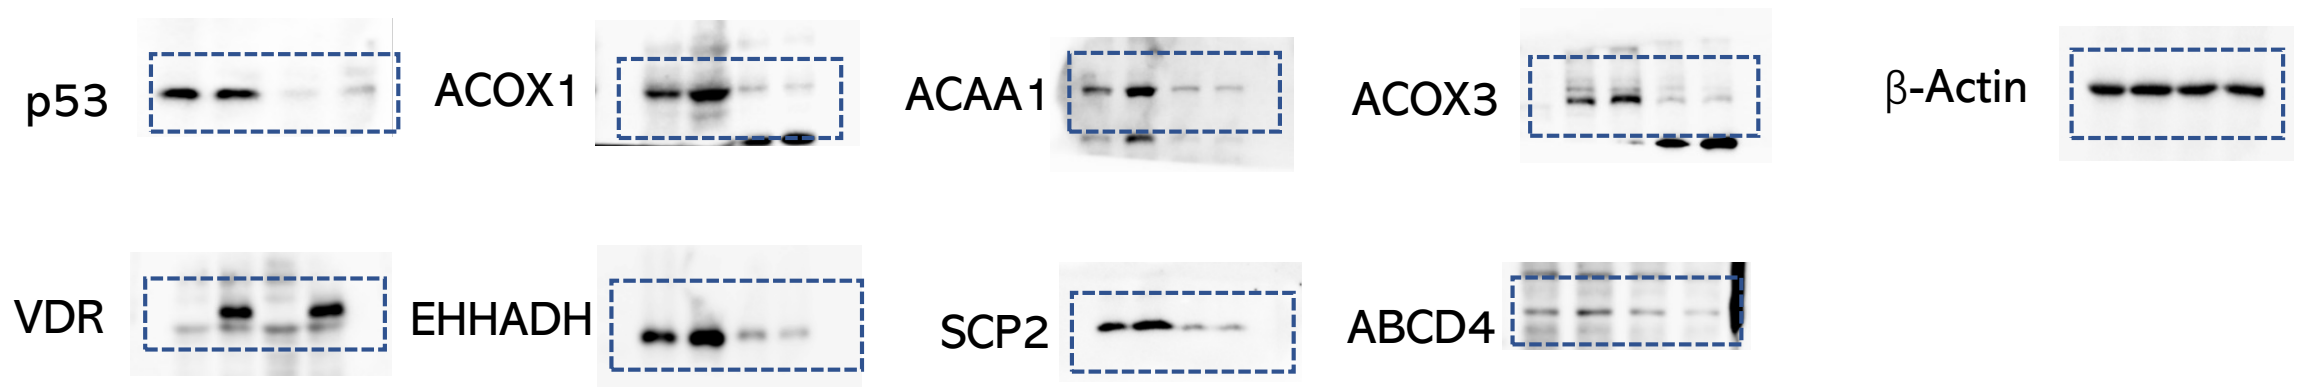

**Fig. S2a**

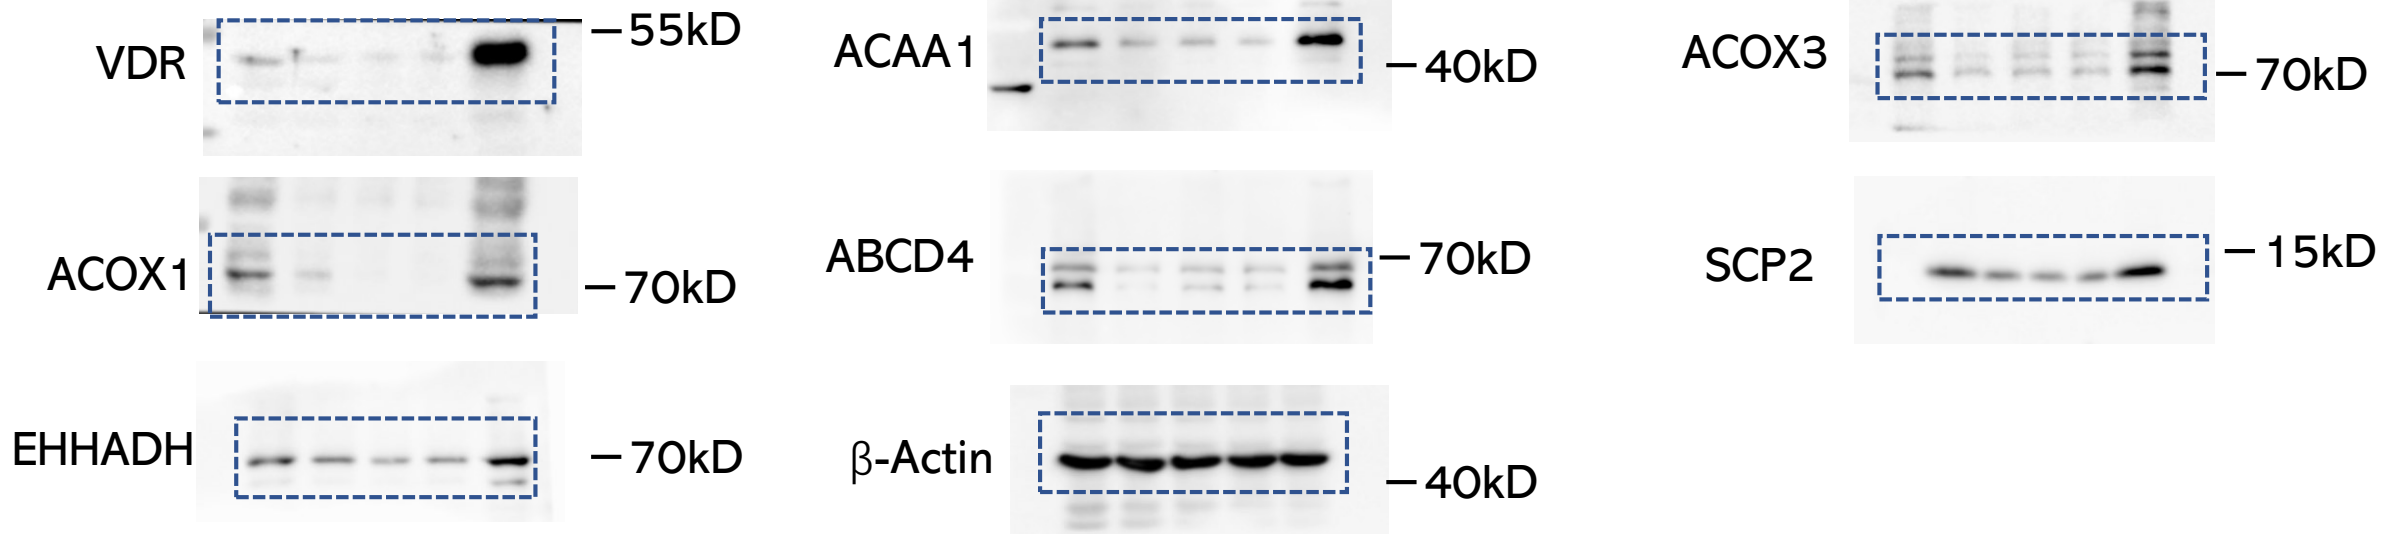

**Fig. S2a**

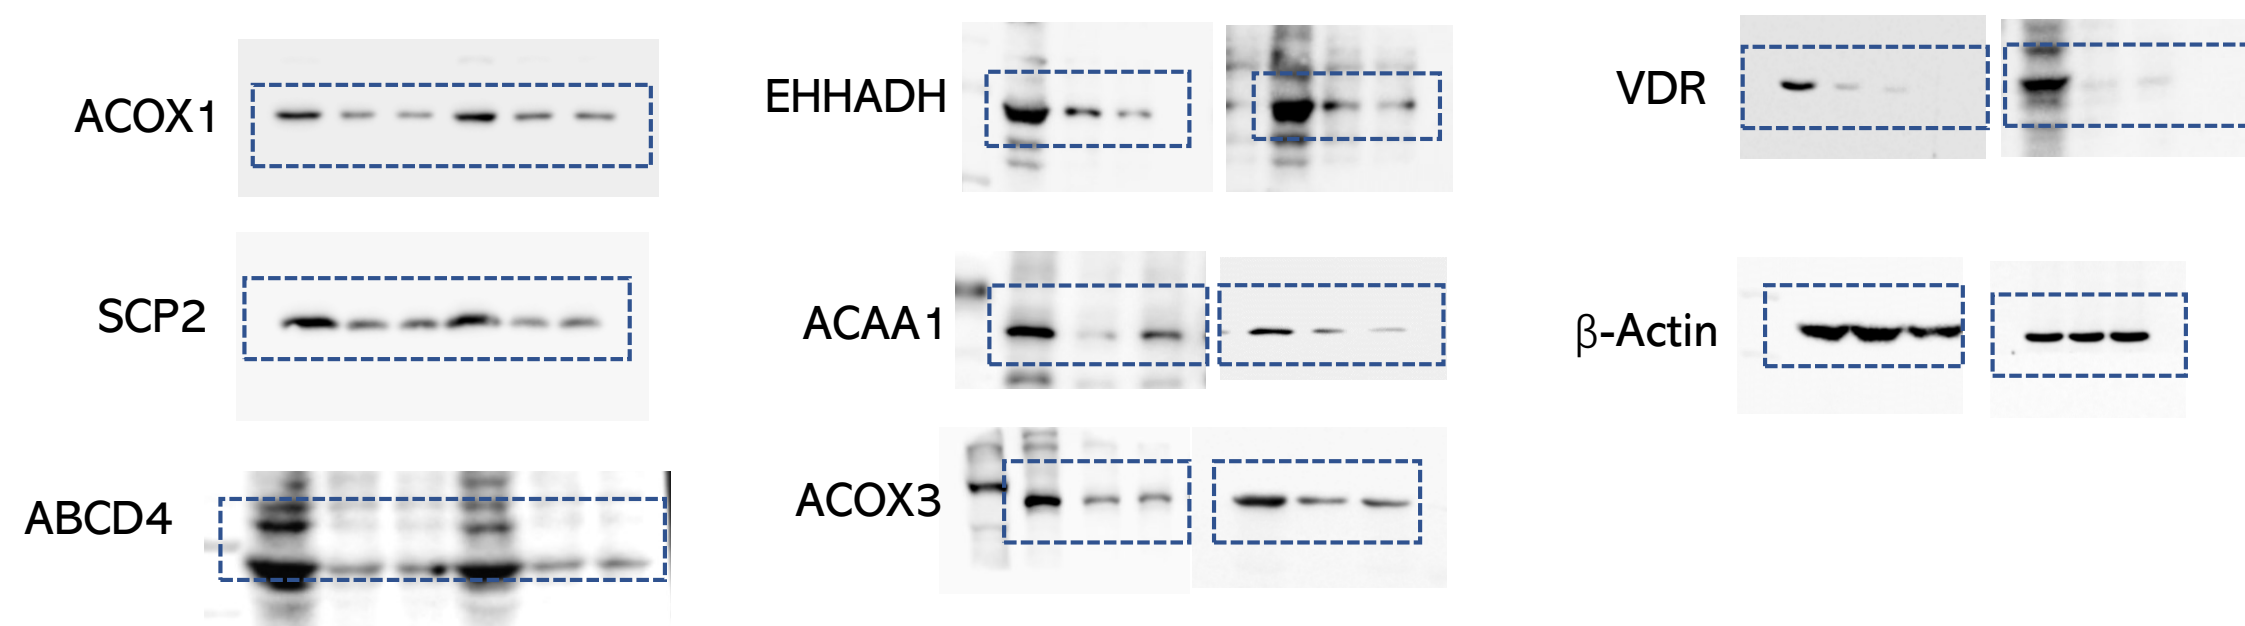

Fig. S2b

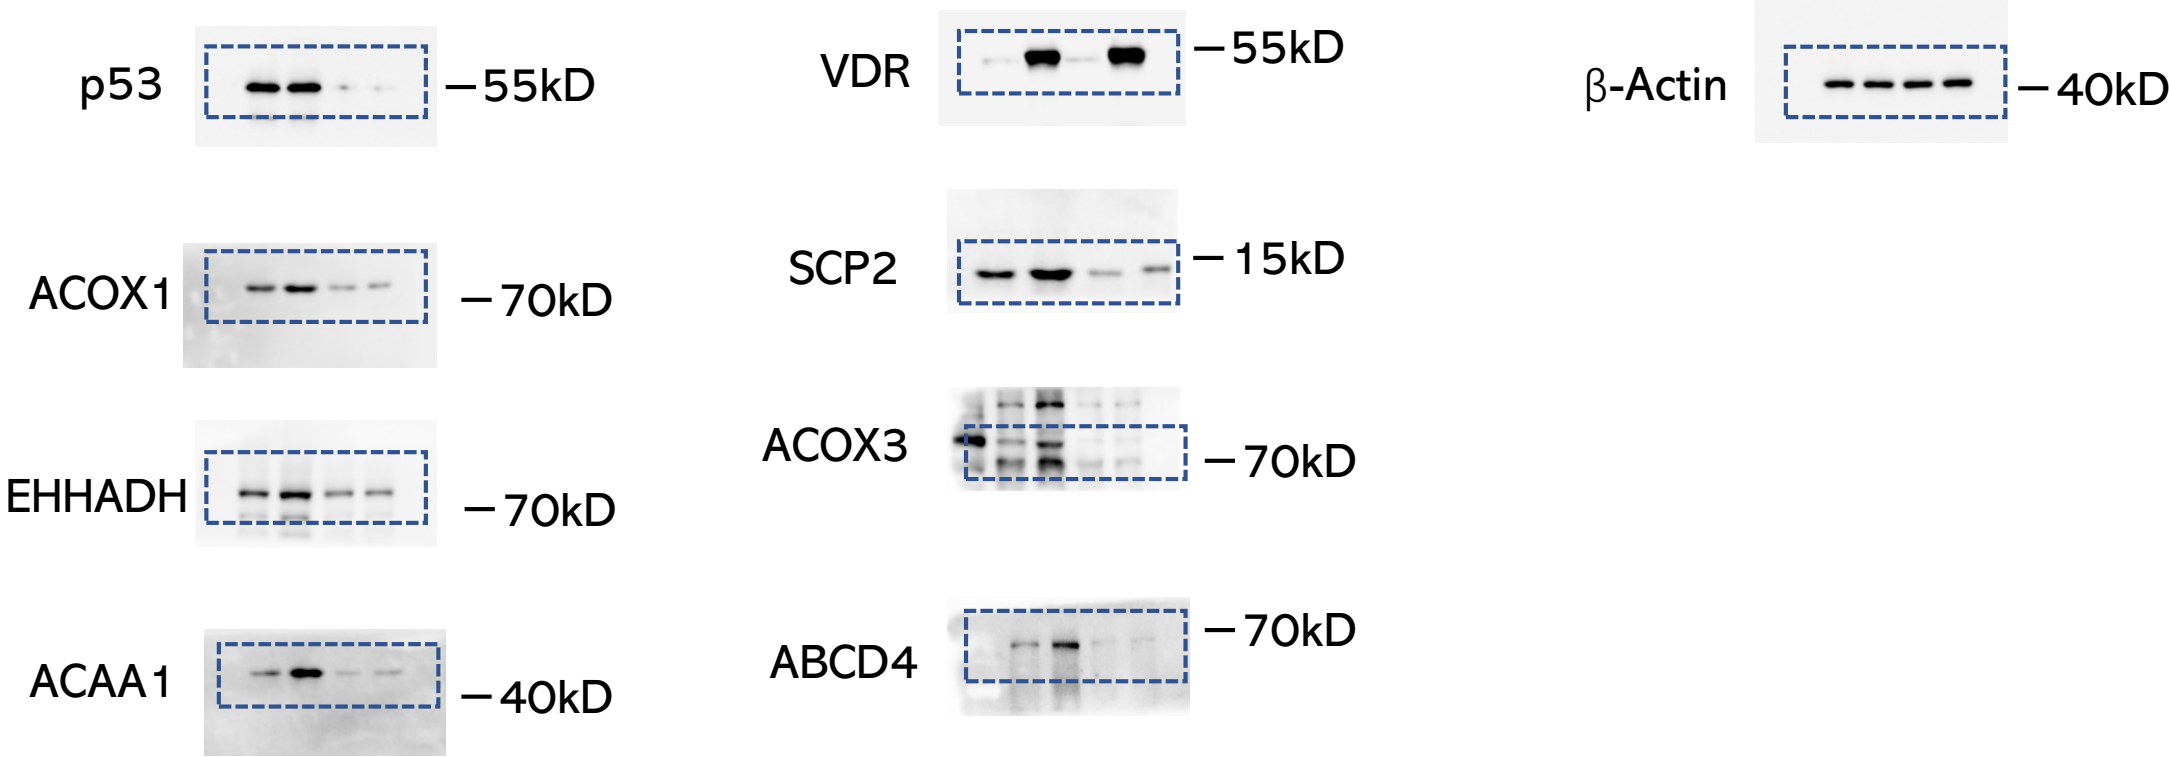

Fig. S2d

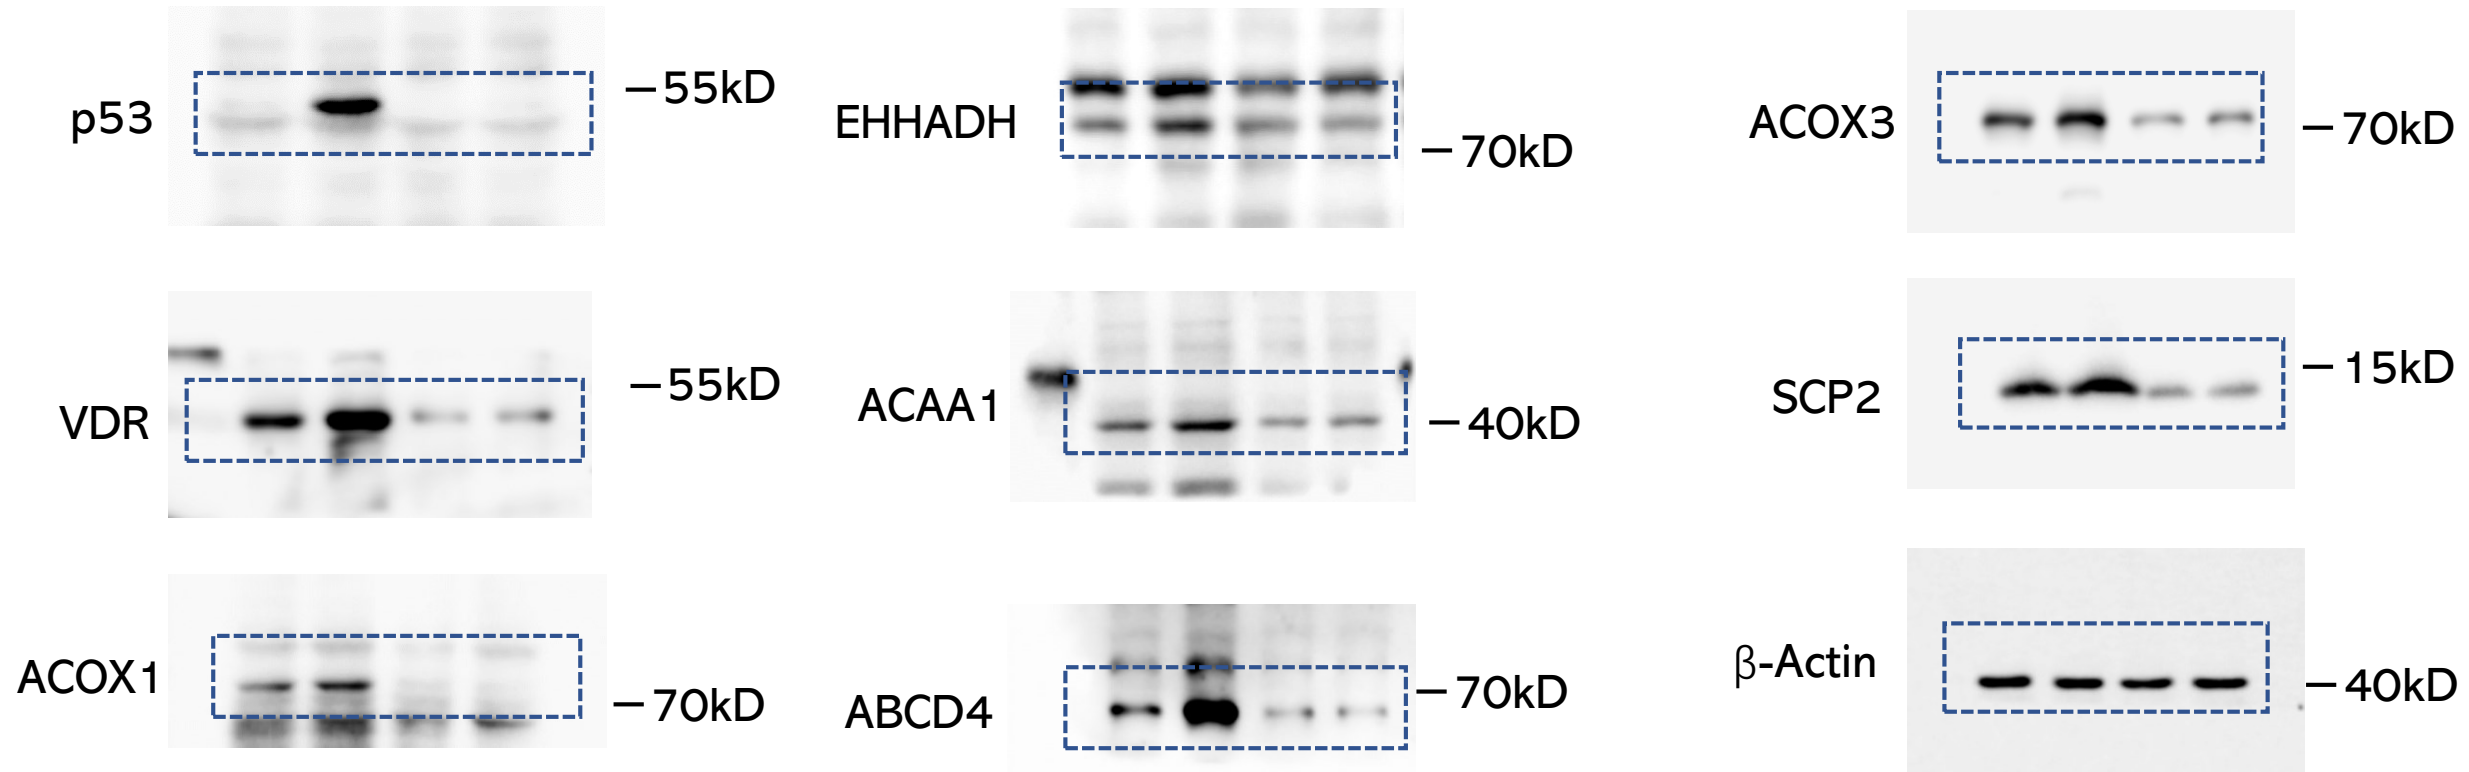



Fig. S2f

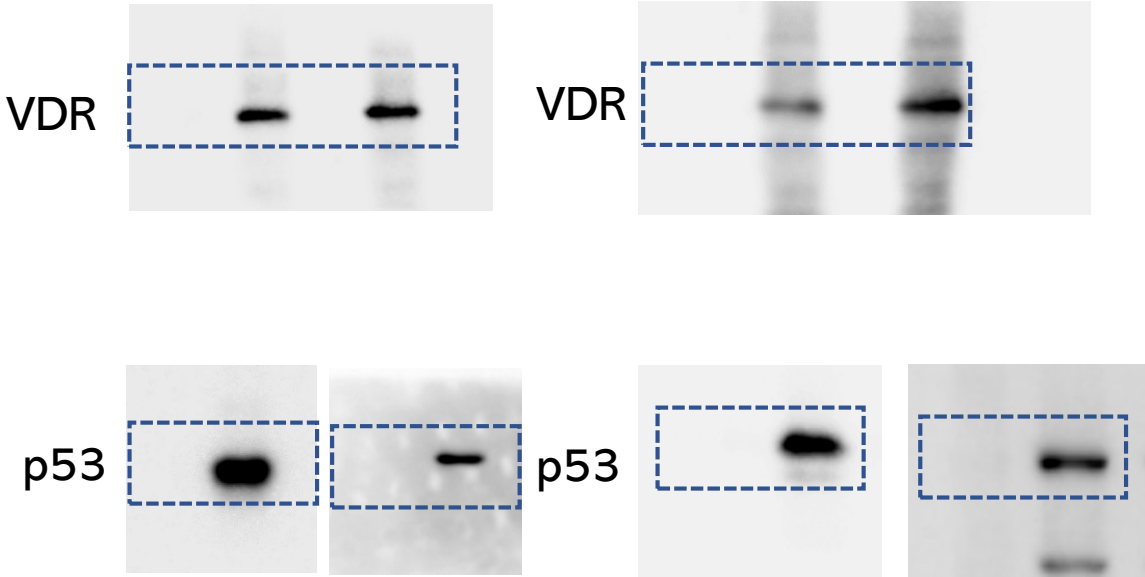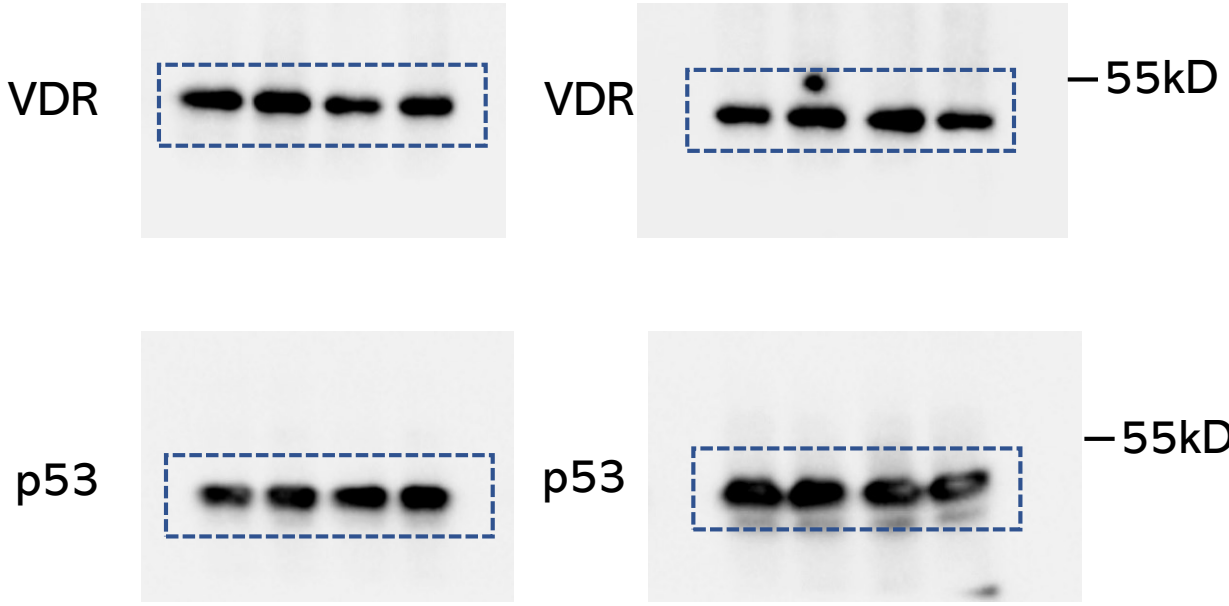

Fig. S2h

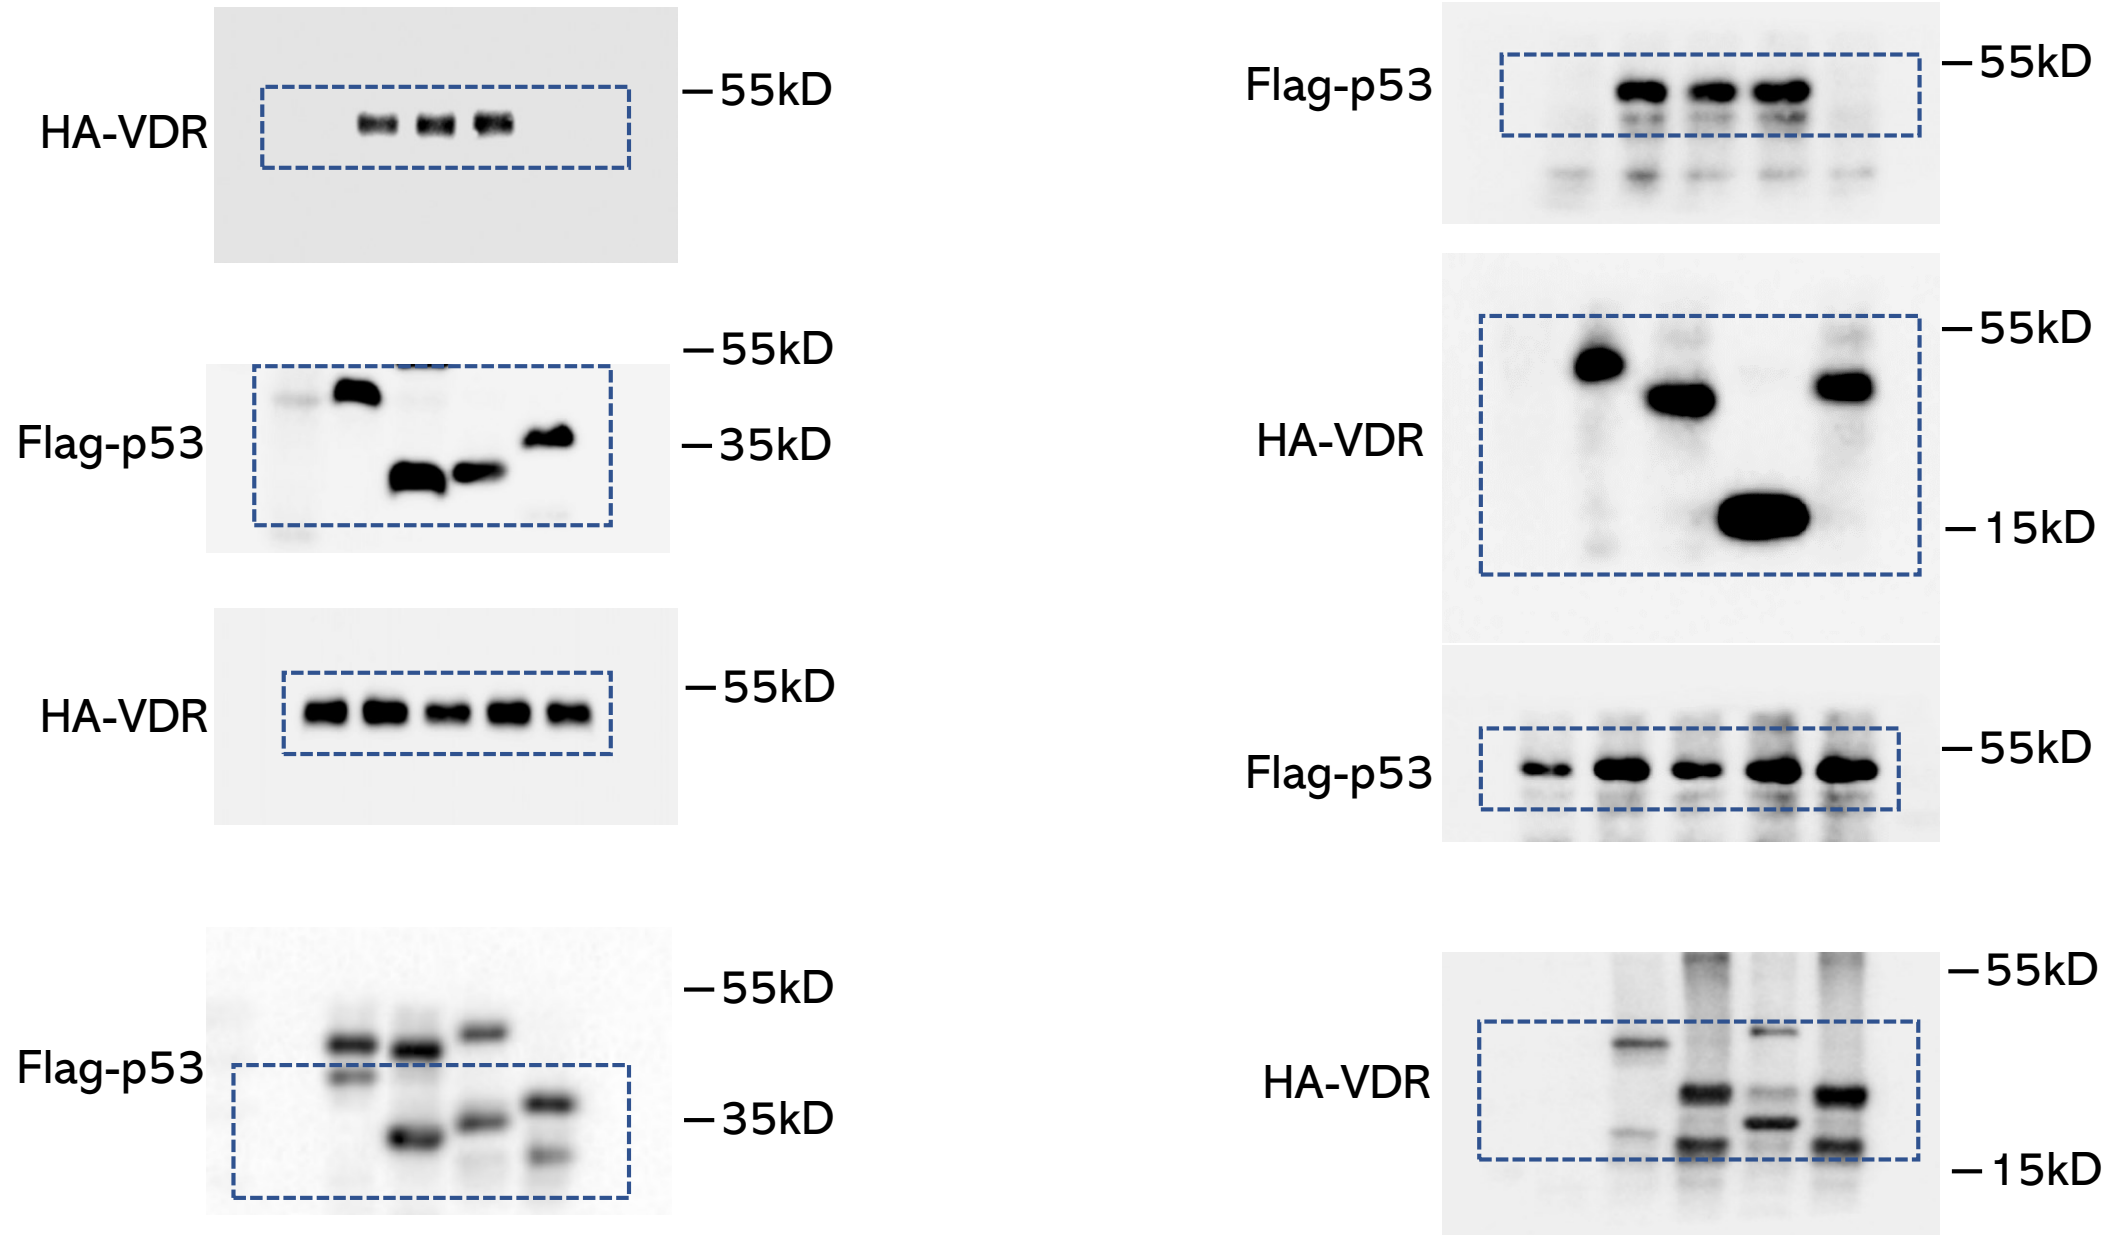

Fig. S2i

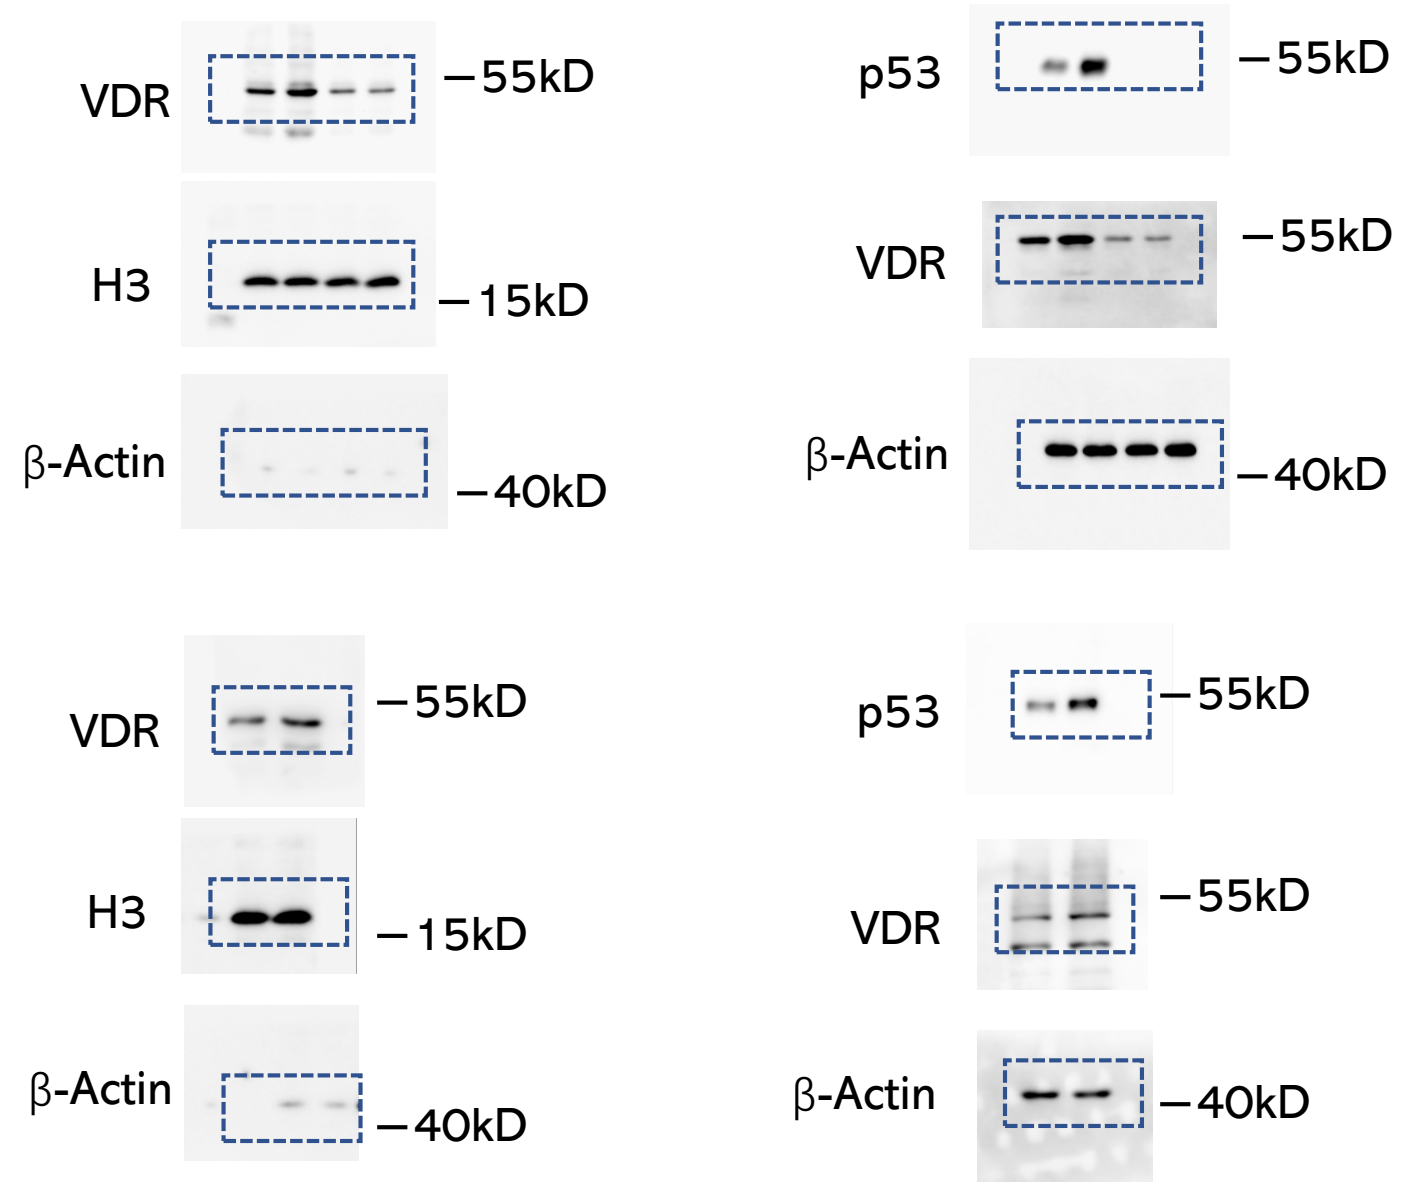

**Fig. 3e**

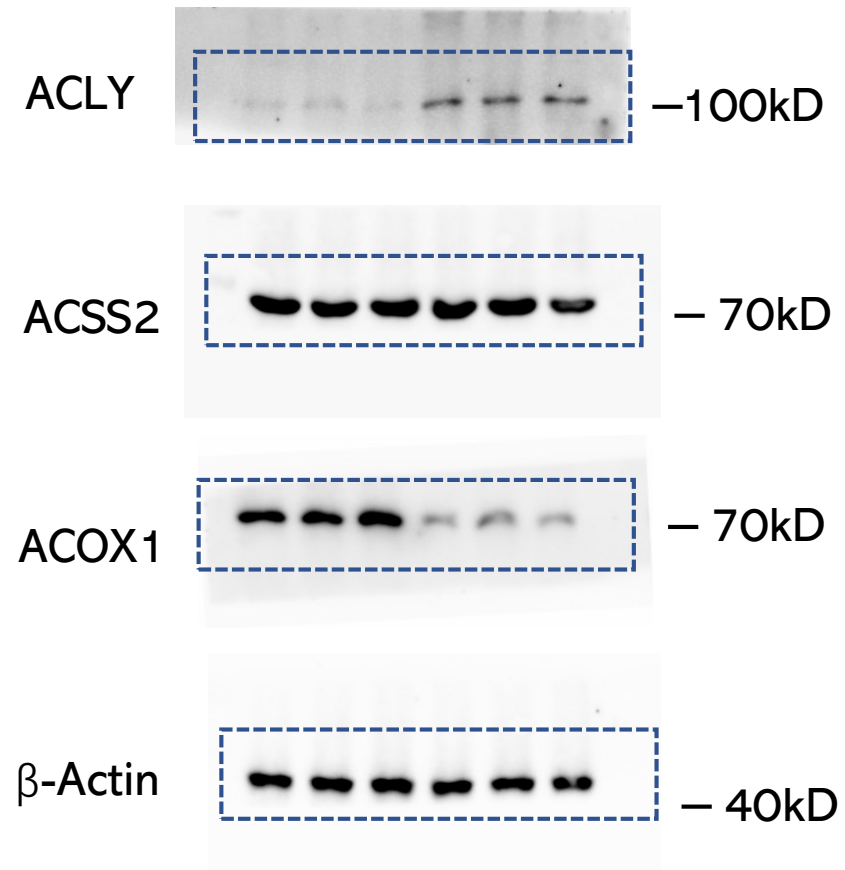

**Fig. 3h**

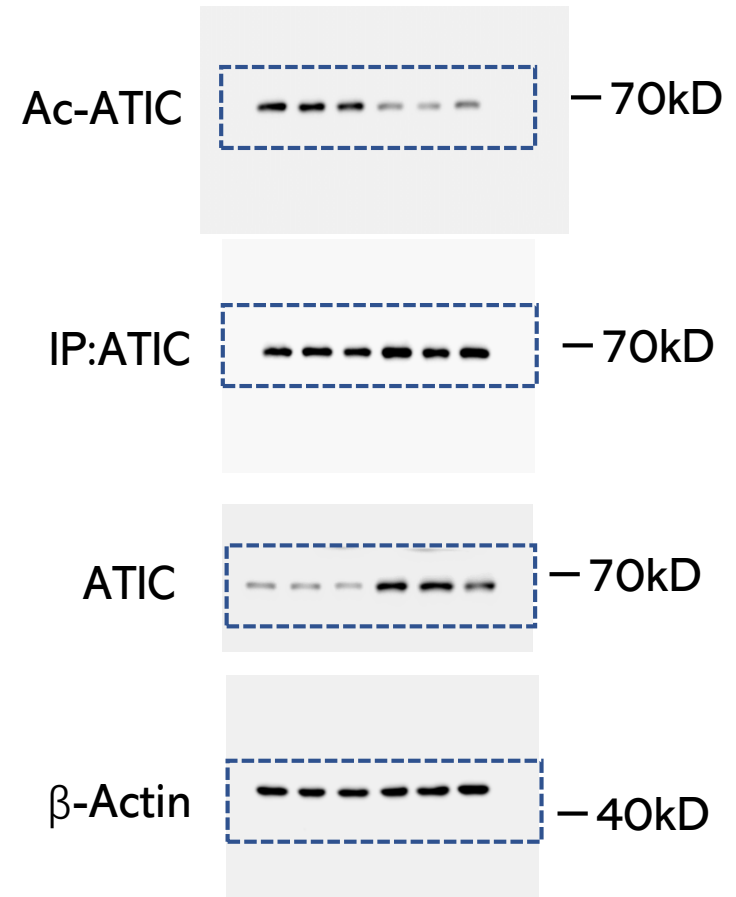

Fig. S3b

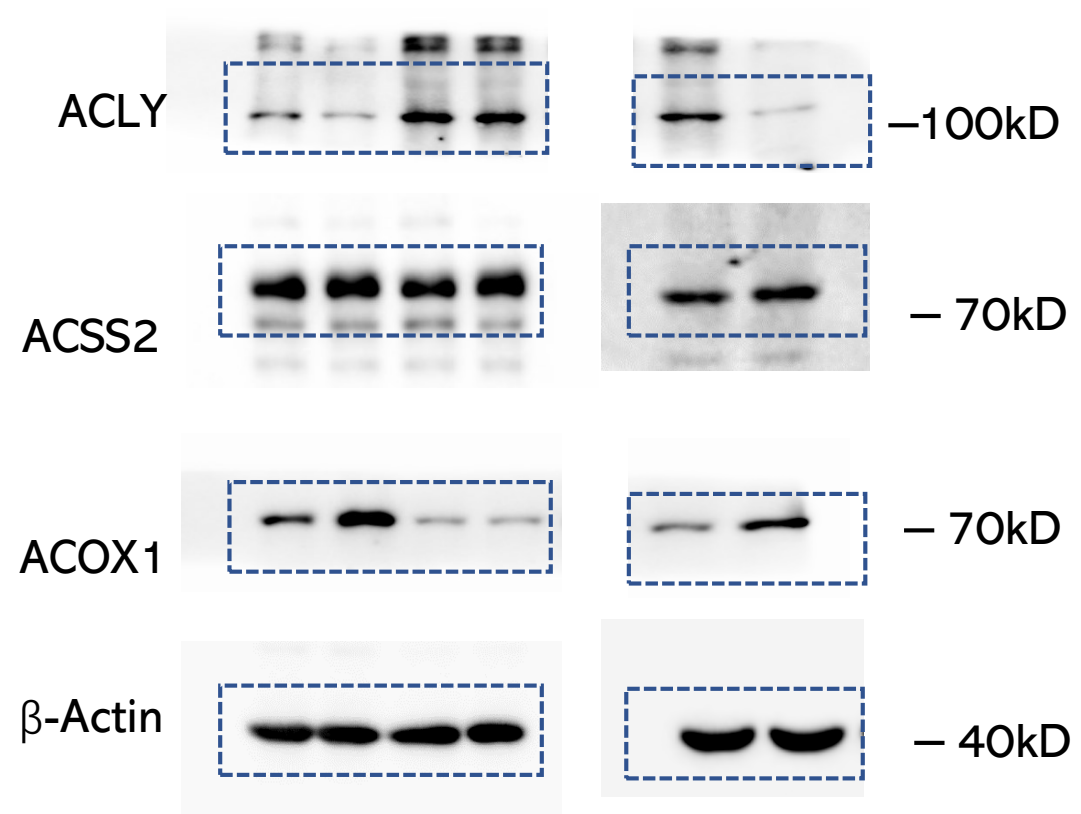

Fig. S3d

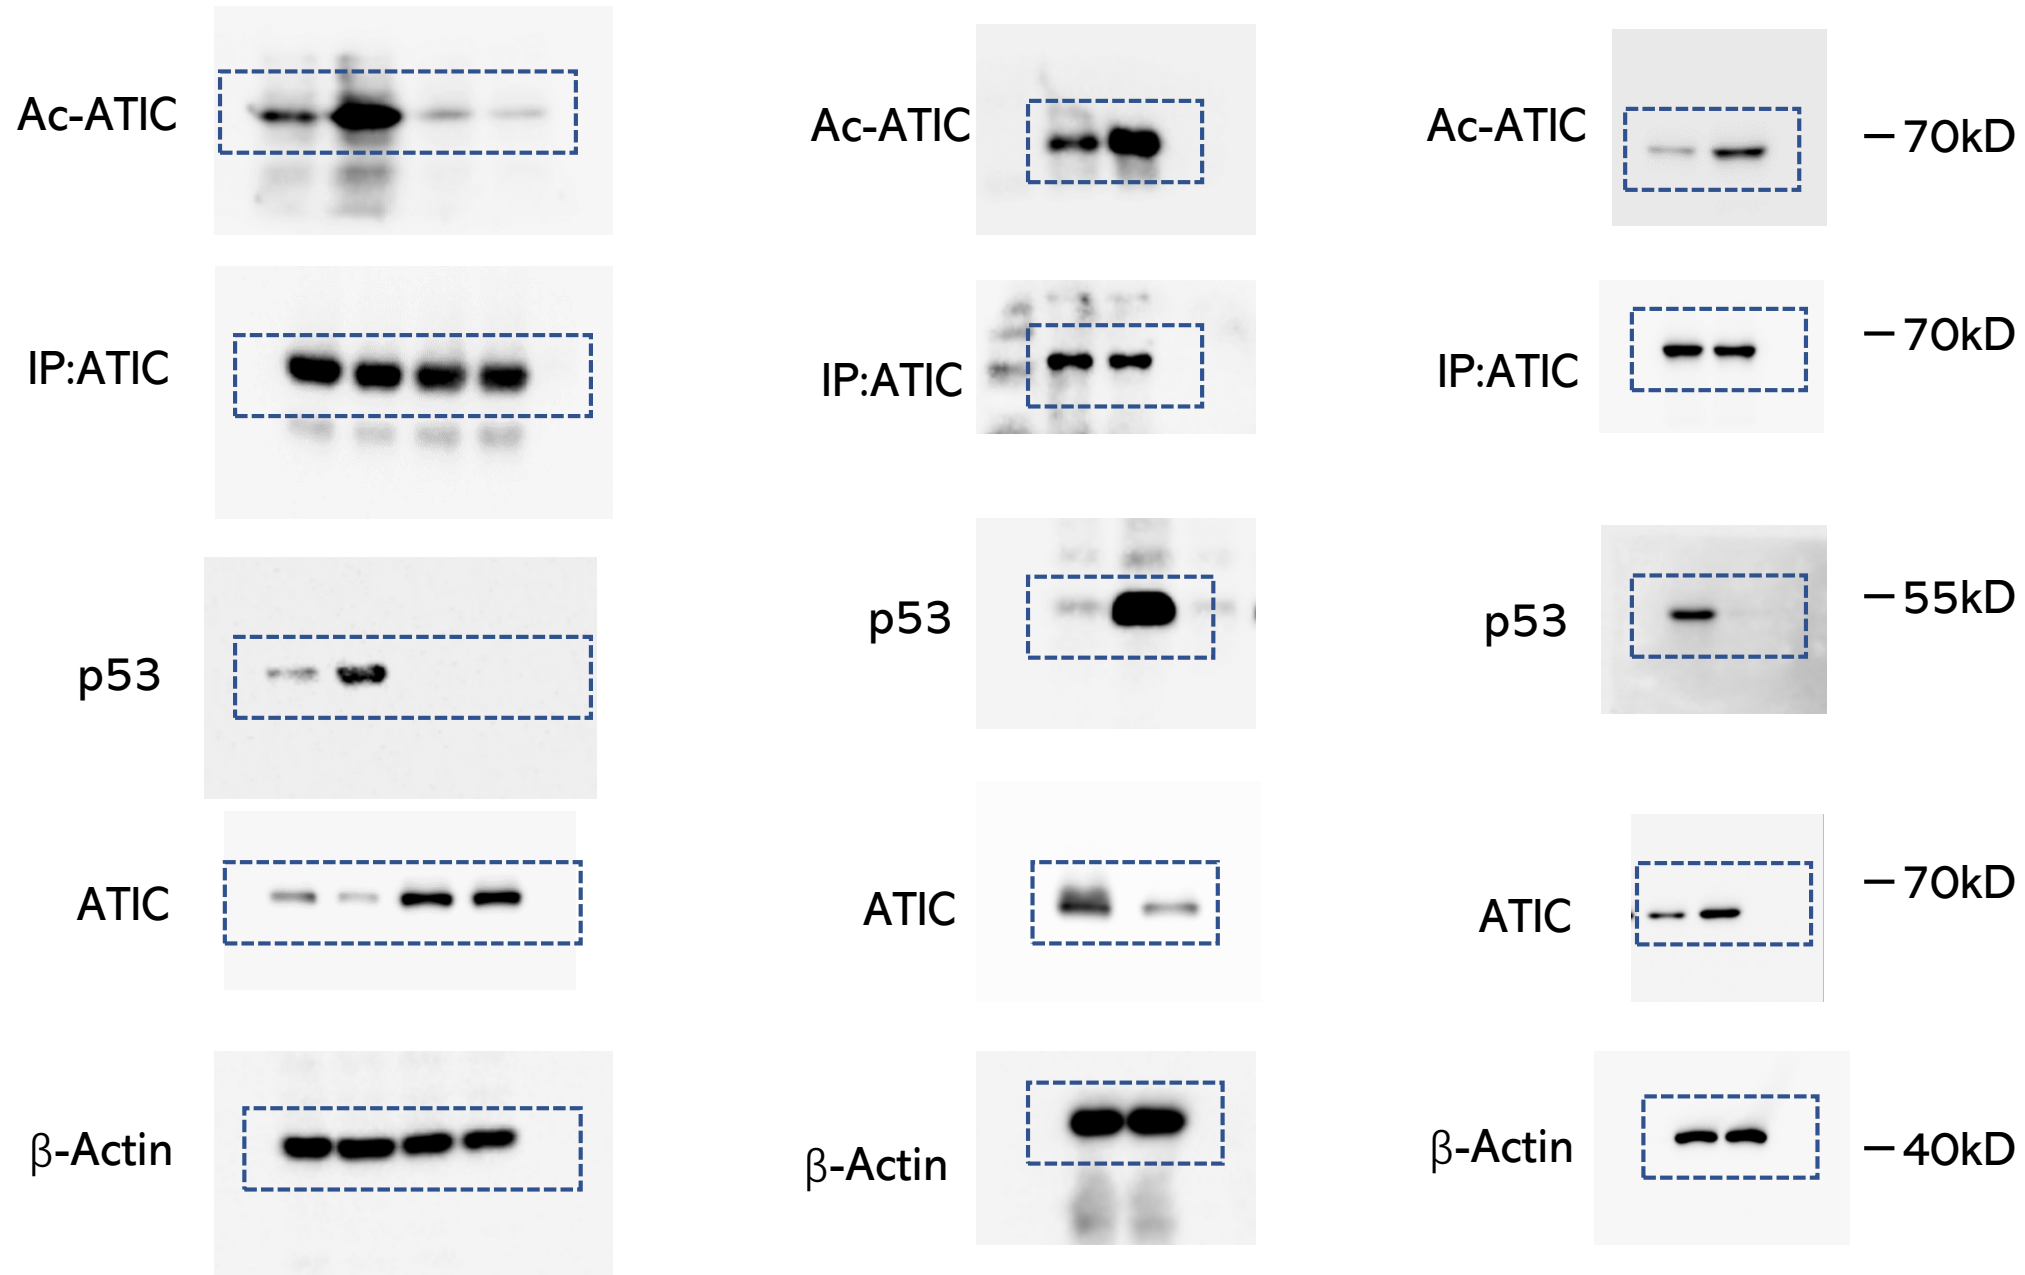



Fig. S3f

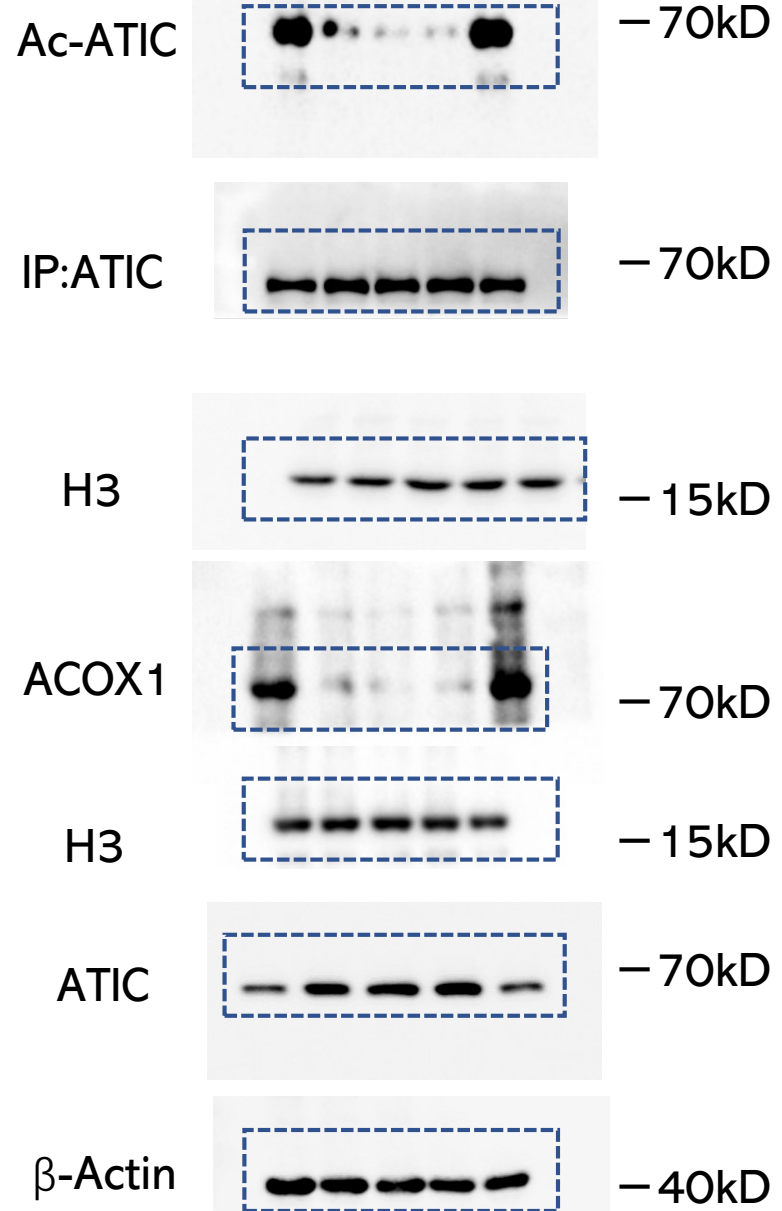

Fig. S3h

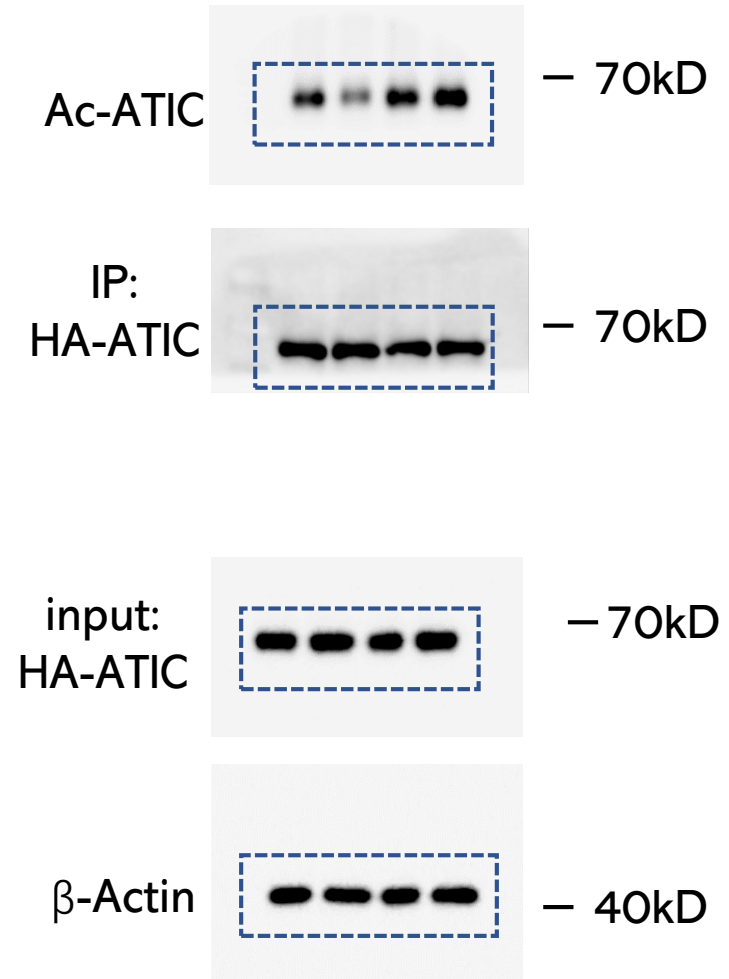



**Fig. S3j**

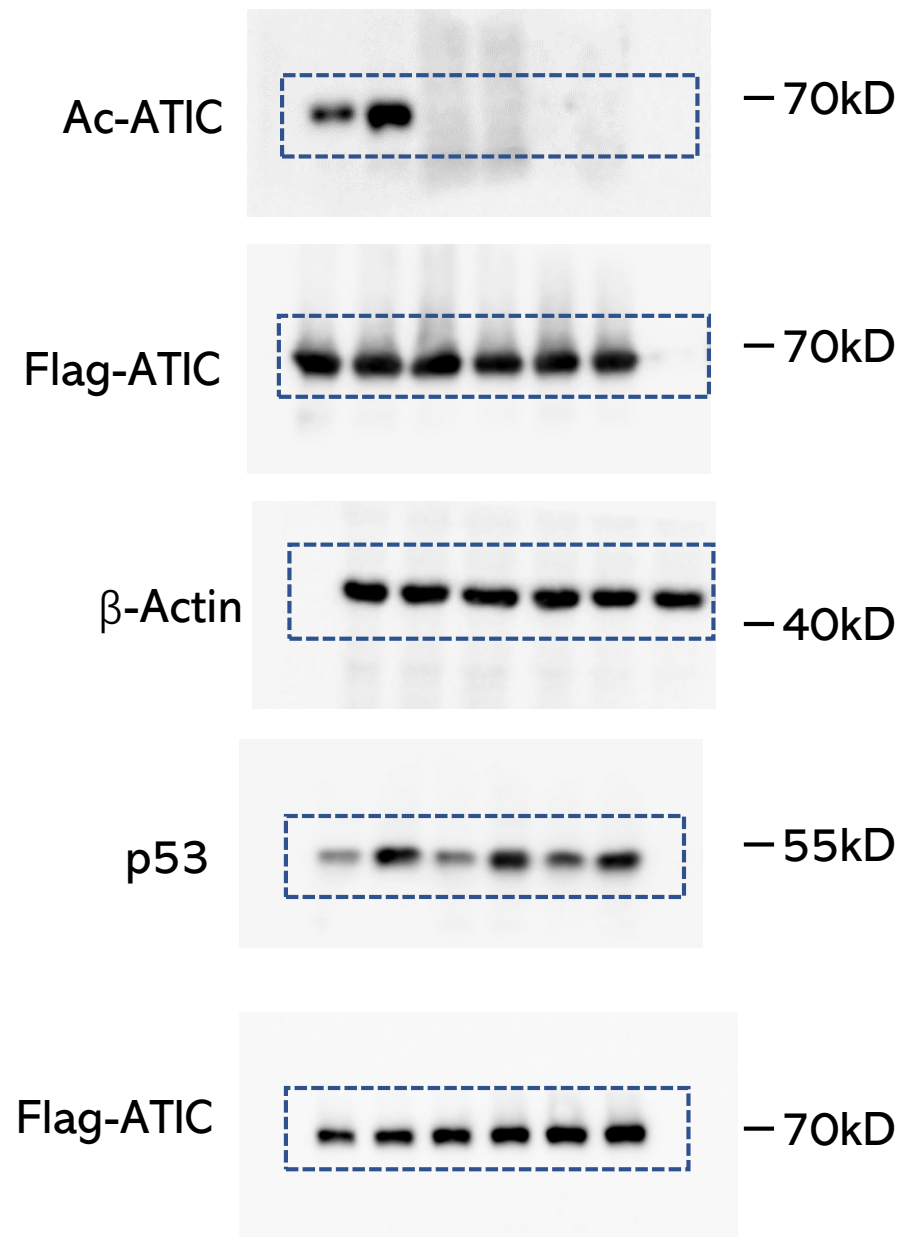

**Fig. 4b**

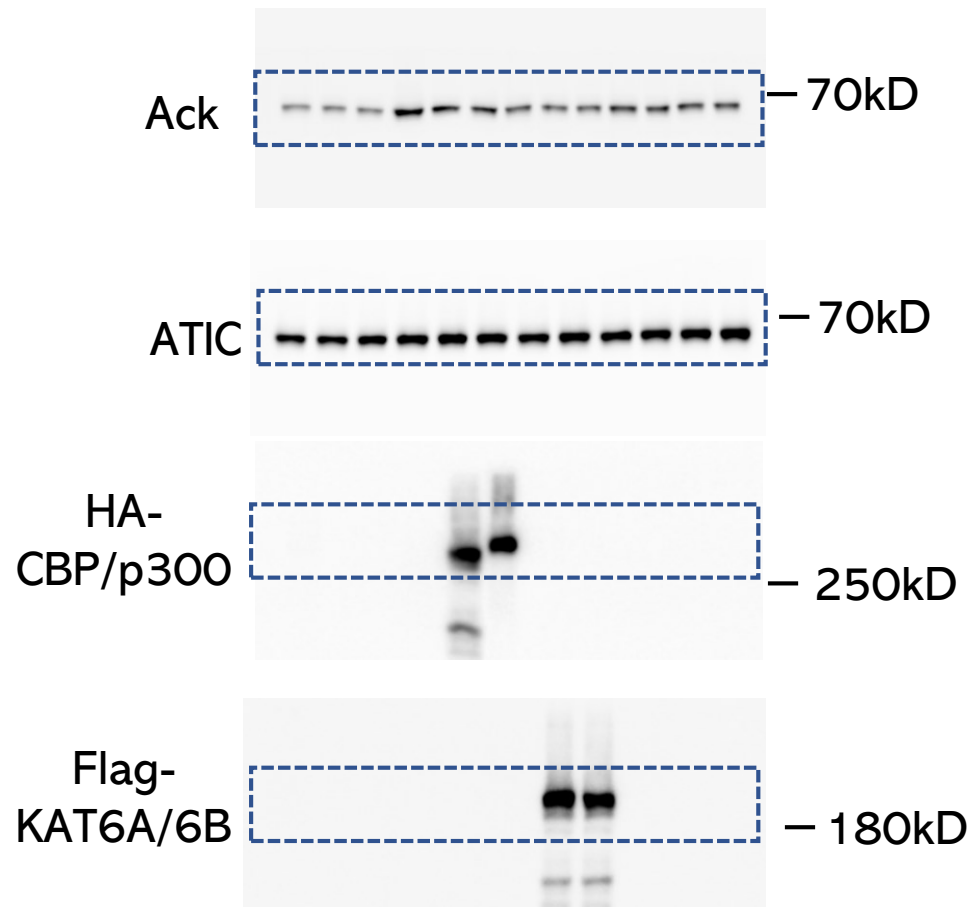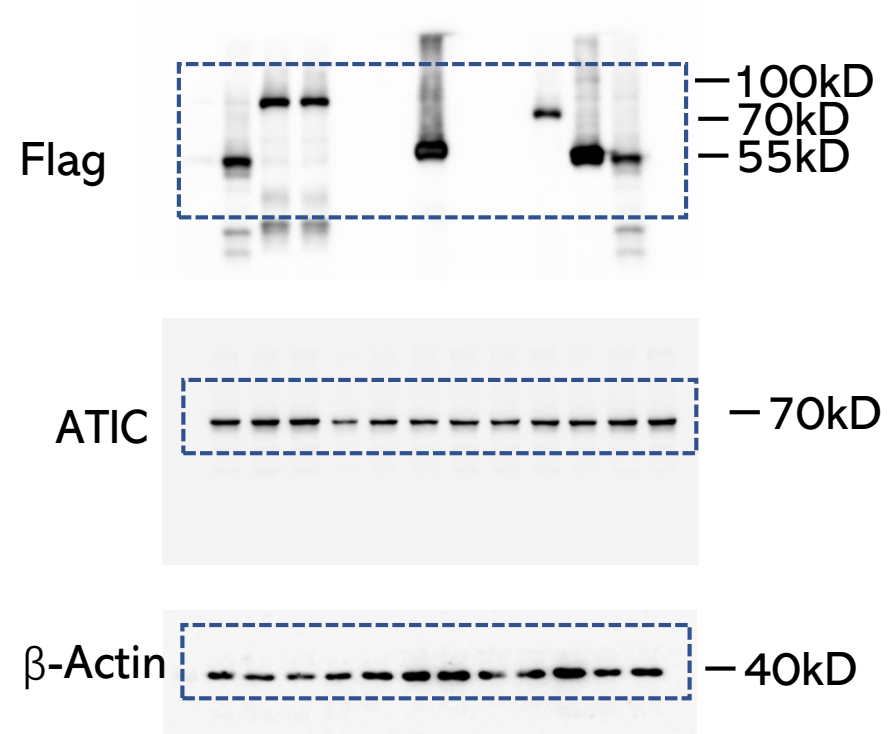

Fig. 4c

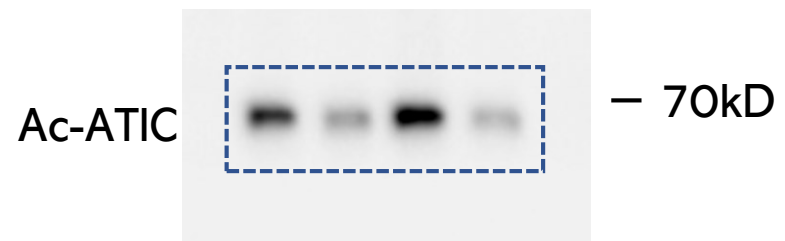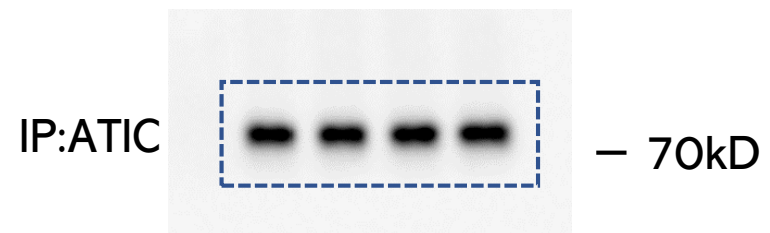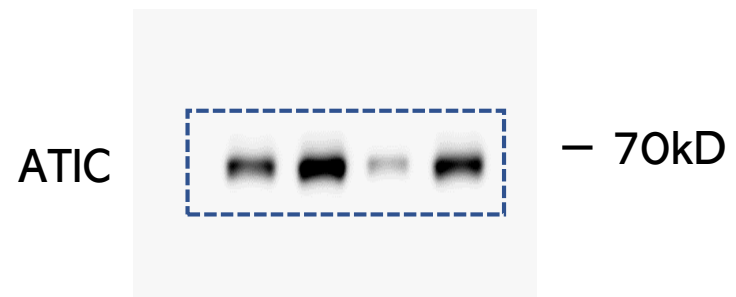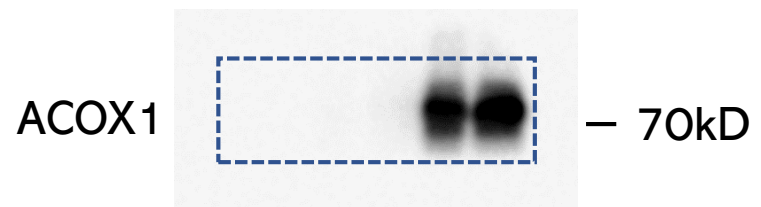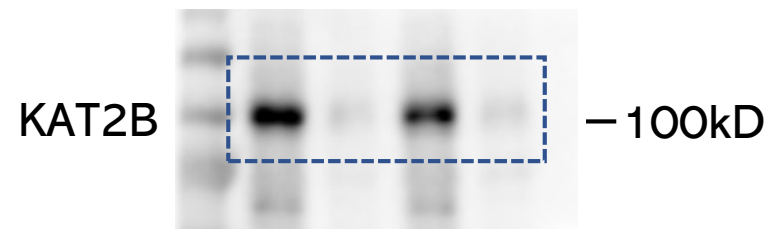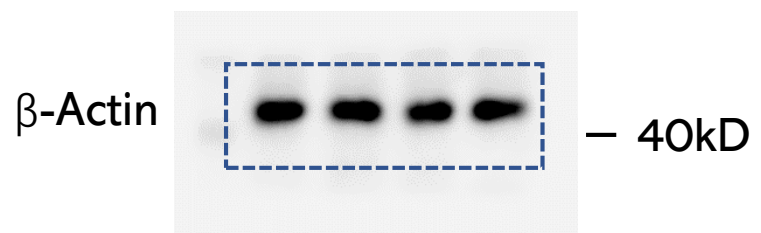

**Fig. 4d**

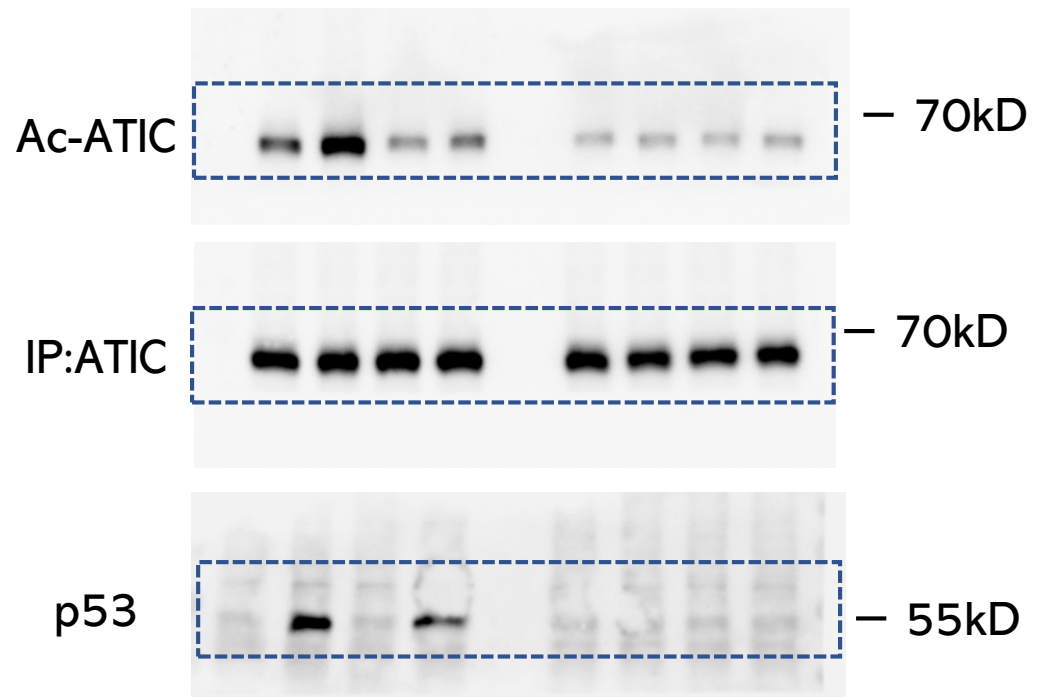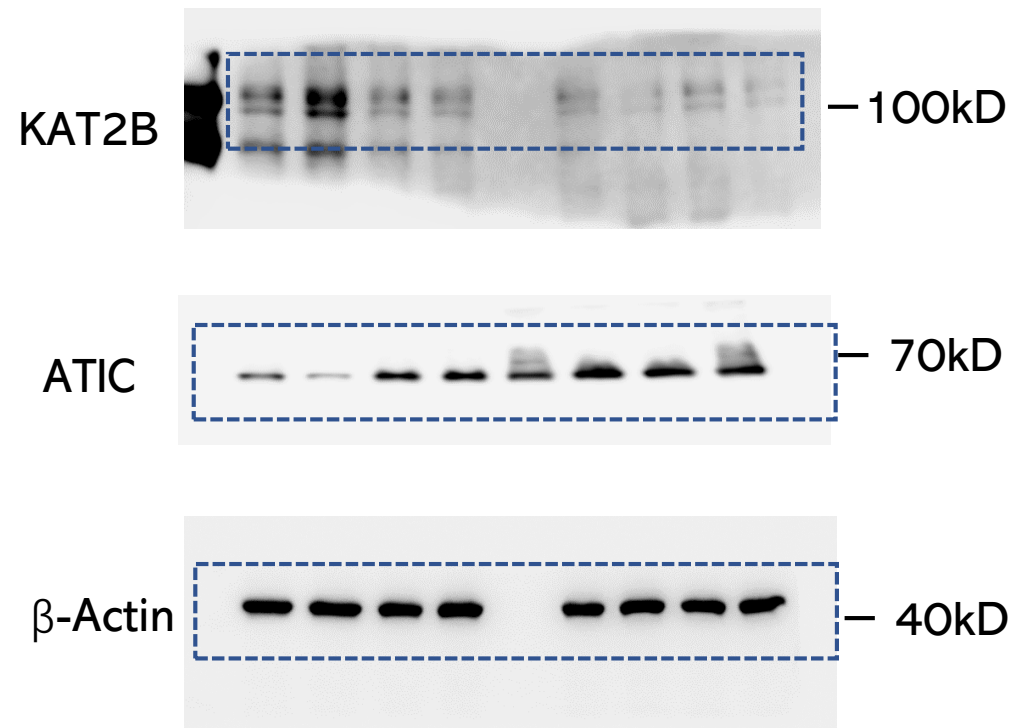

Fig. 4e

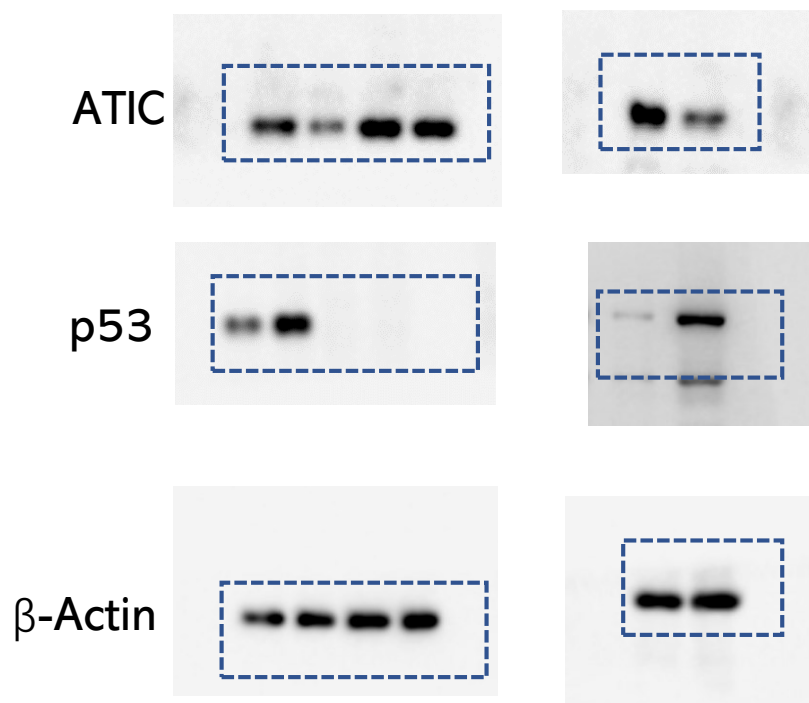

Fig. 4f

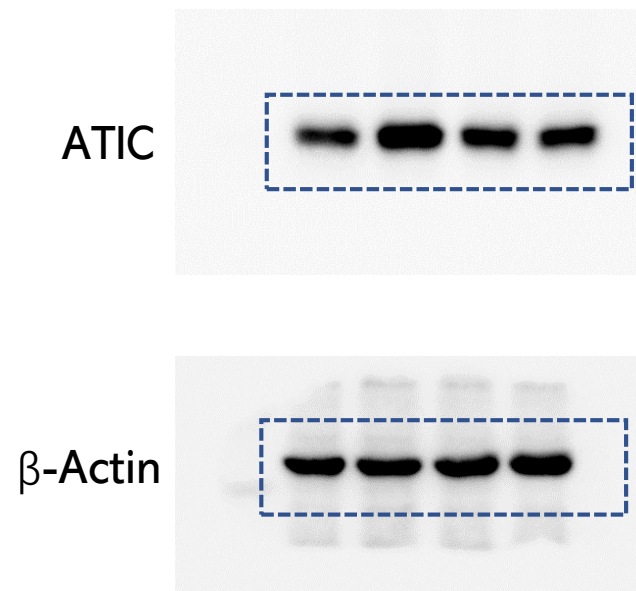

Fig. 4g

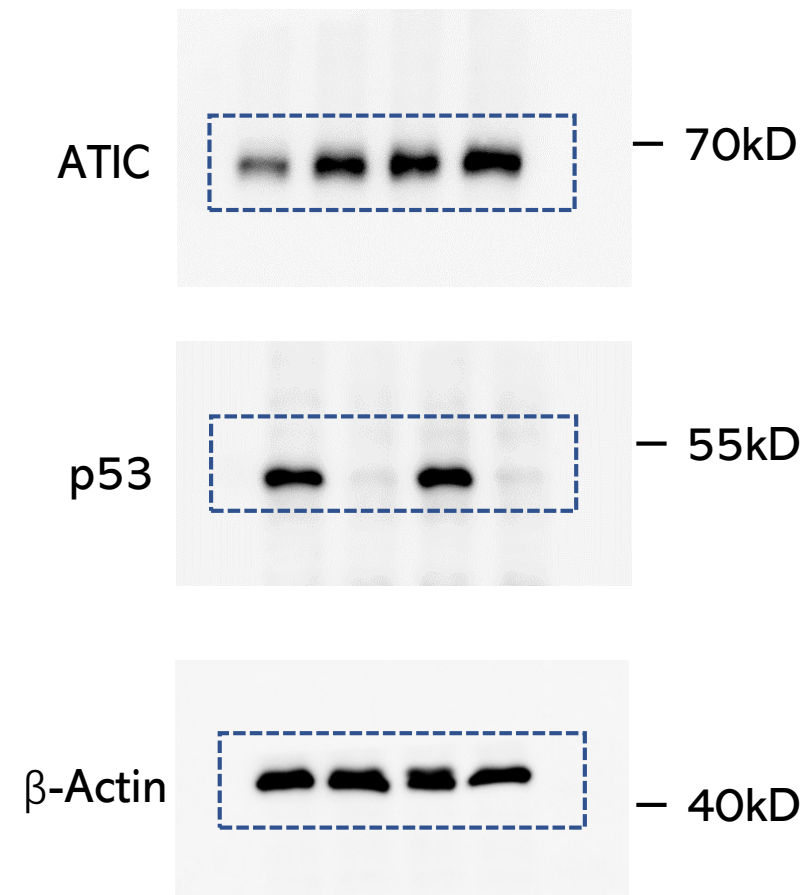

**Fig. S4b**

KAT2A

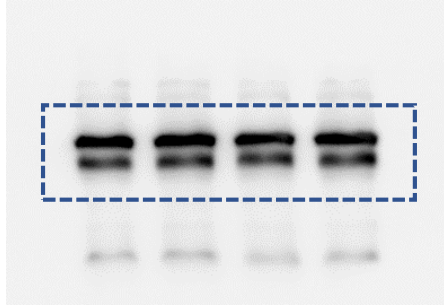

KAT2A

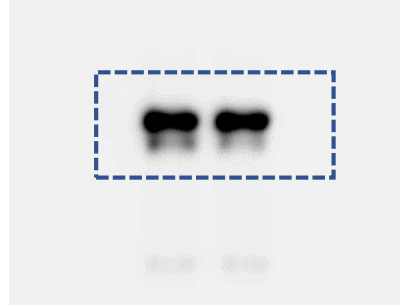

— 100kD

KAT2B

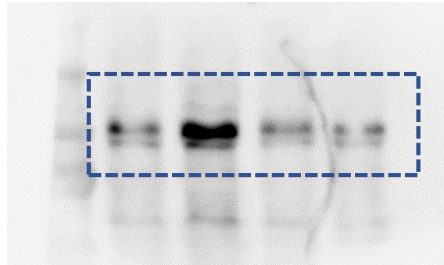

KAT2B

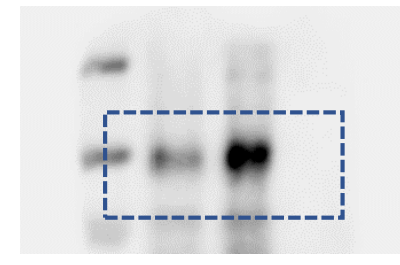

— 100kD

p53

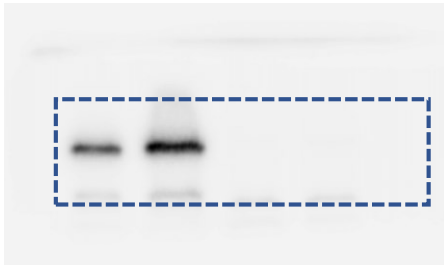

p53

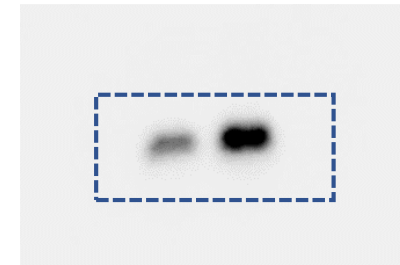

— 55kD

$\beta$ -Actin

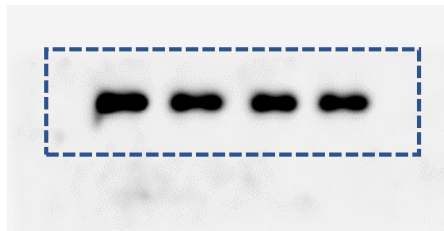

$\beta$ -Actin

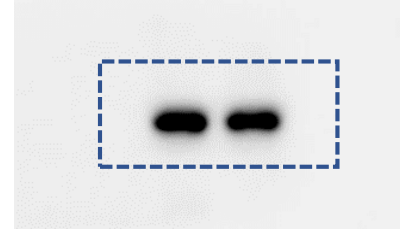

— 40kD

Fig. S4c

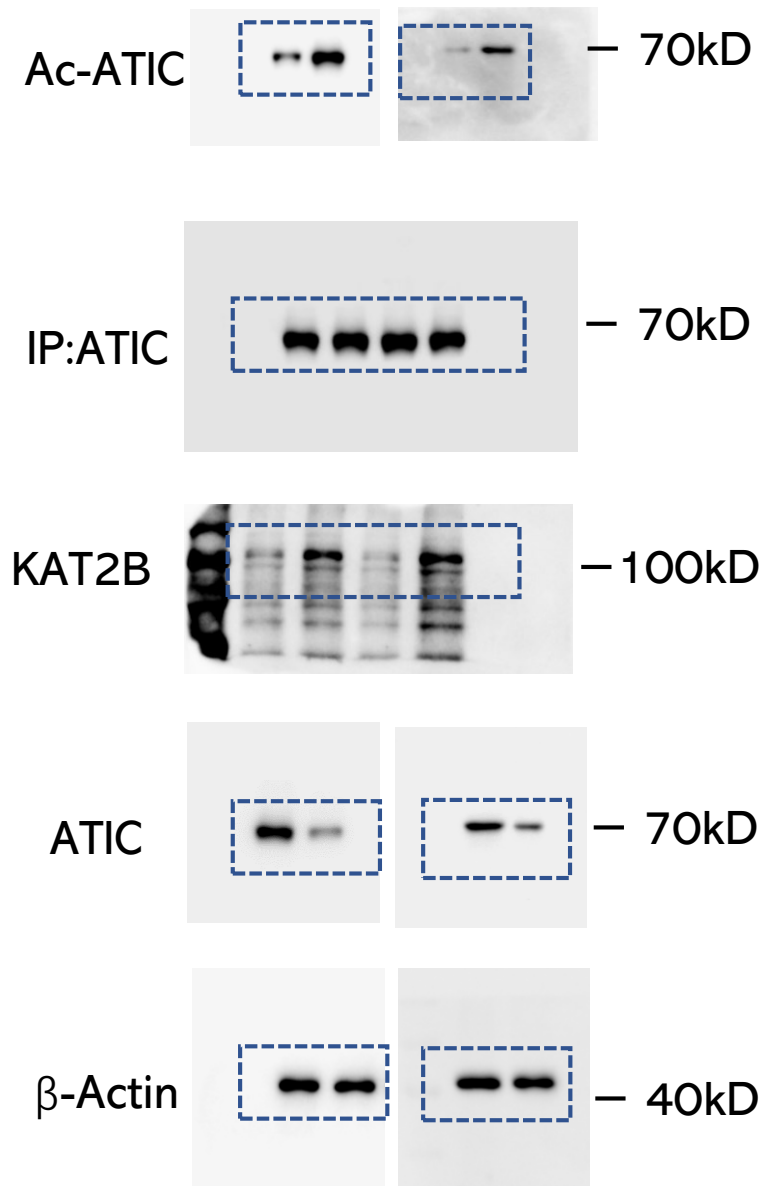

Fig. S4d

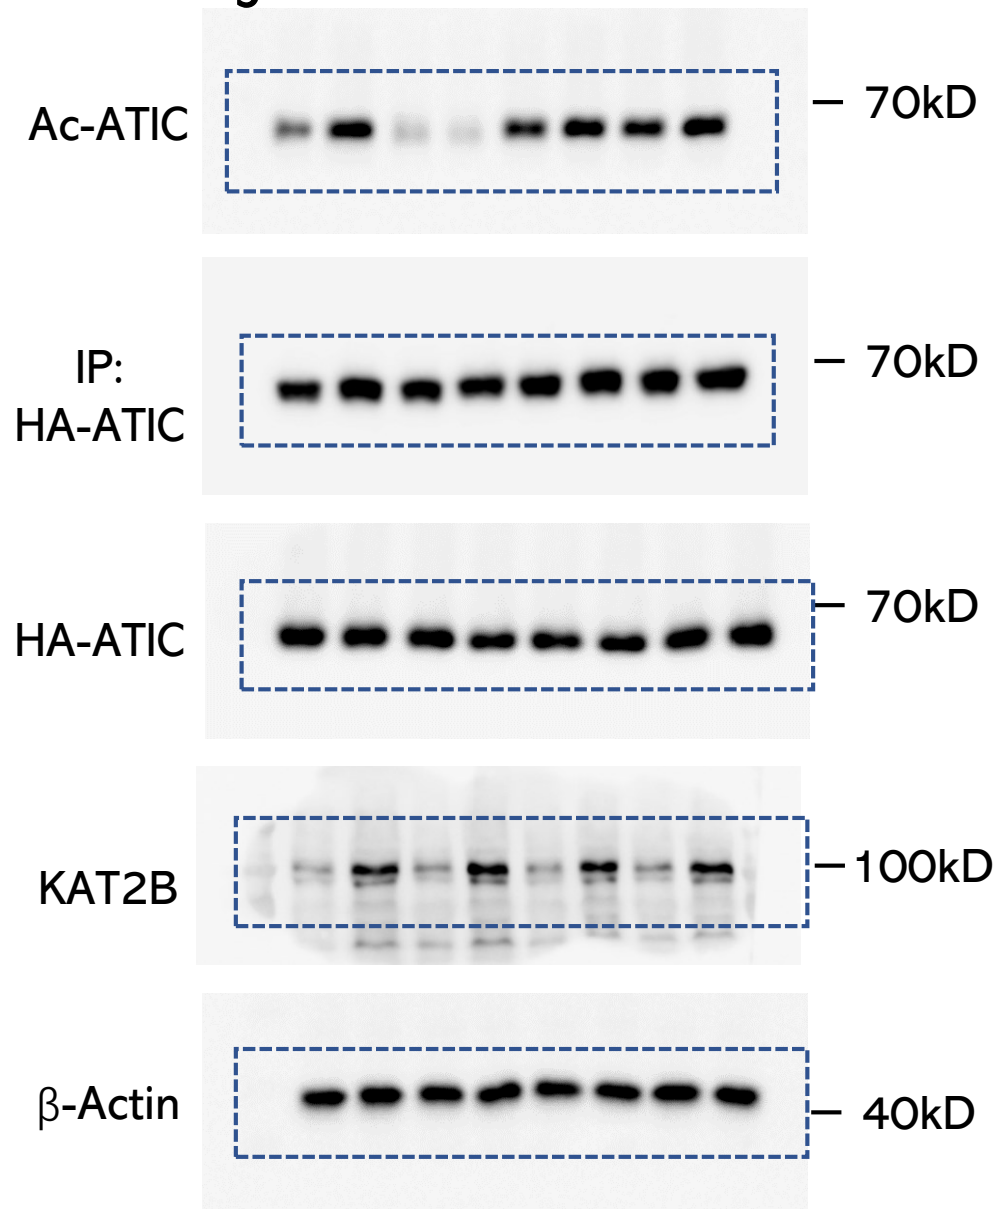

**Fig. S4e**

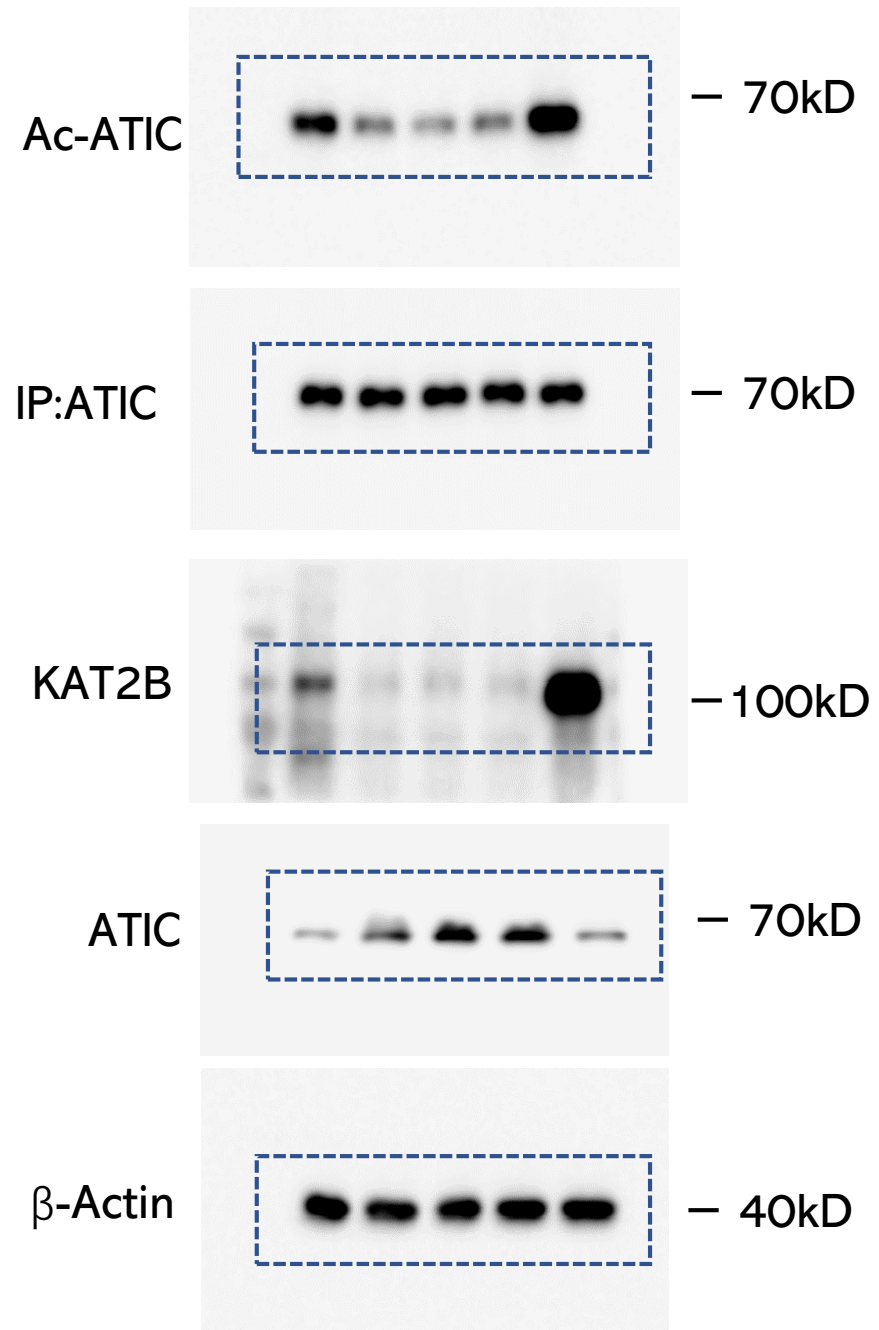

**Fig. S4f**

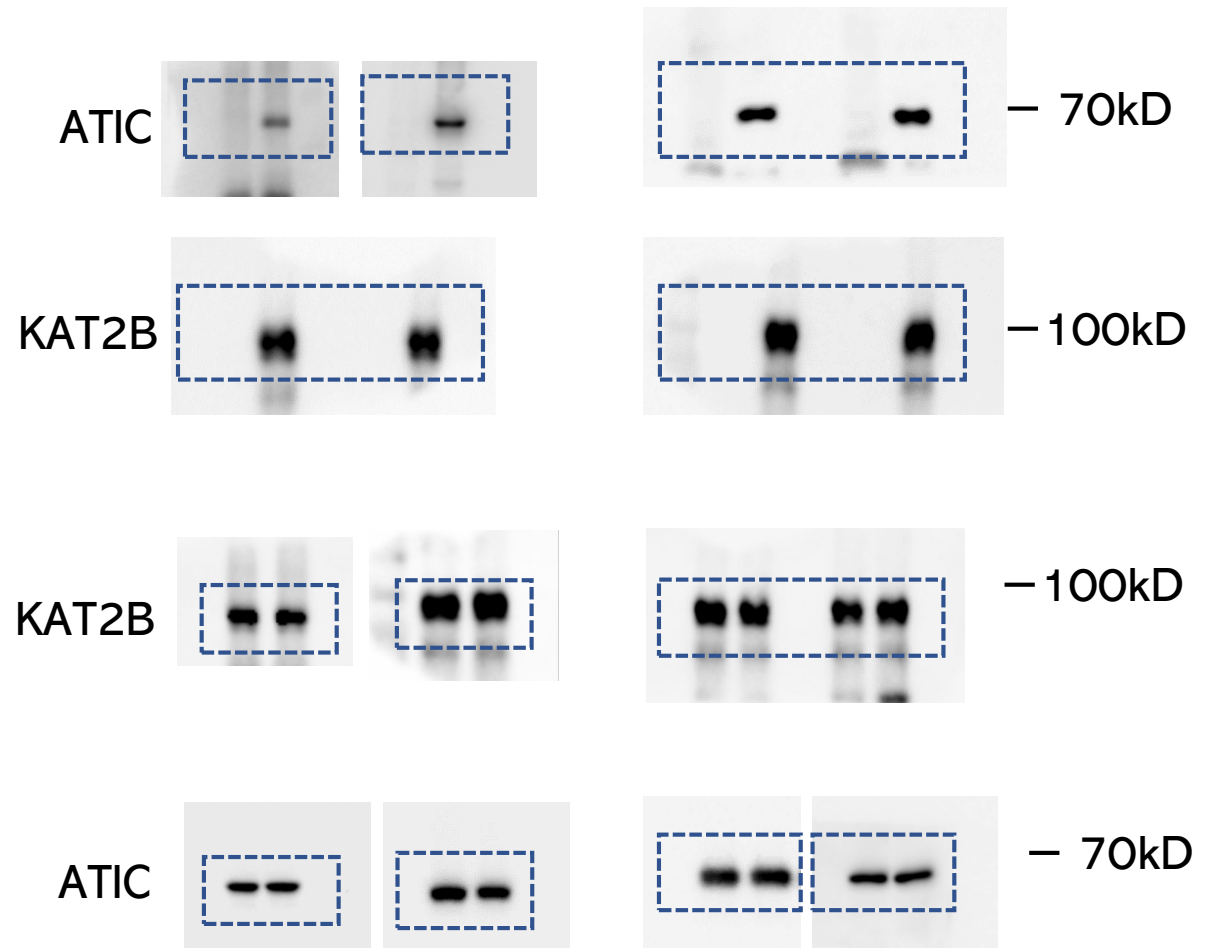



Fig. S4h

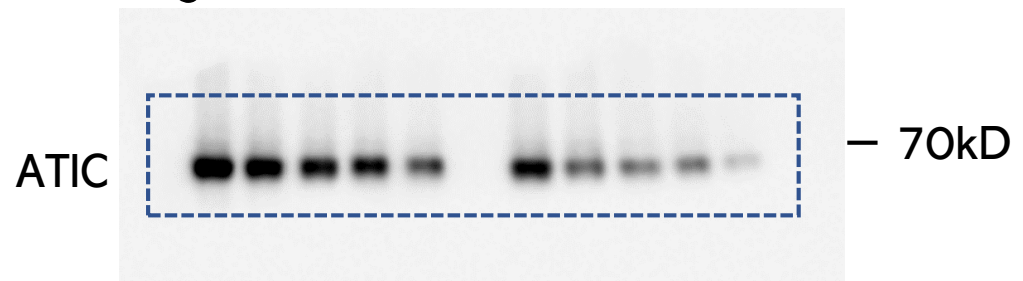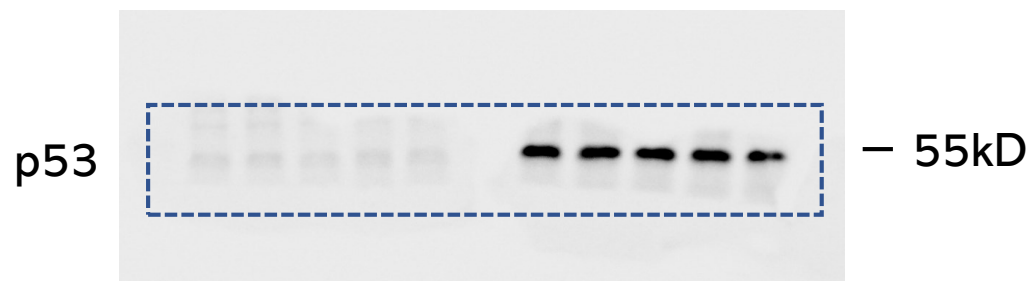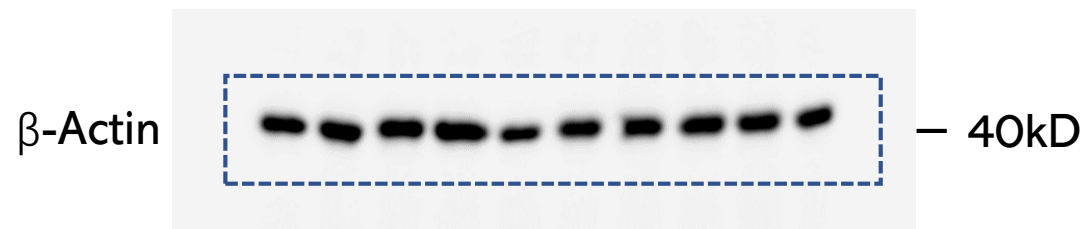

Fig. S4i

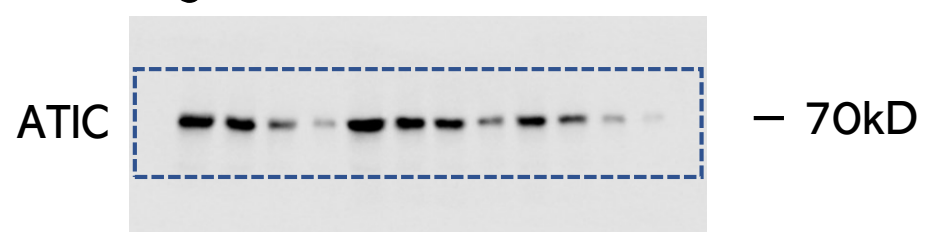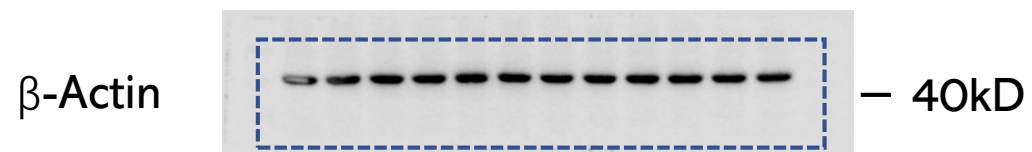



Fig. 5i

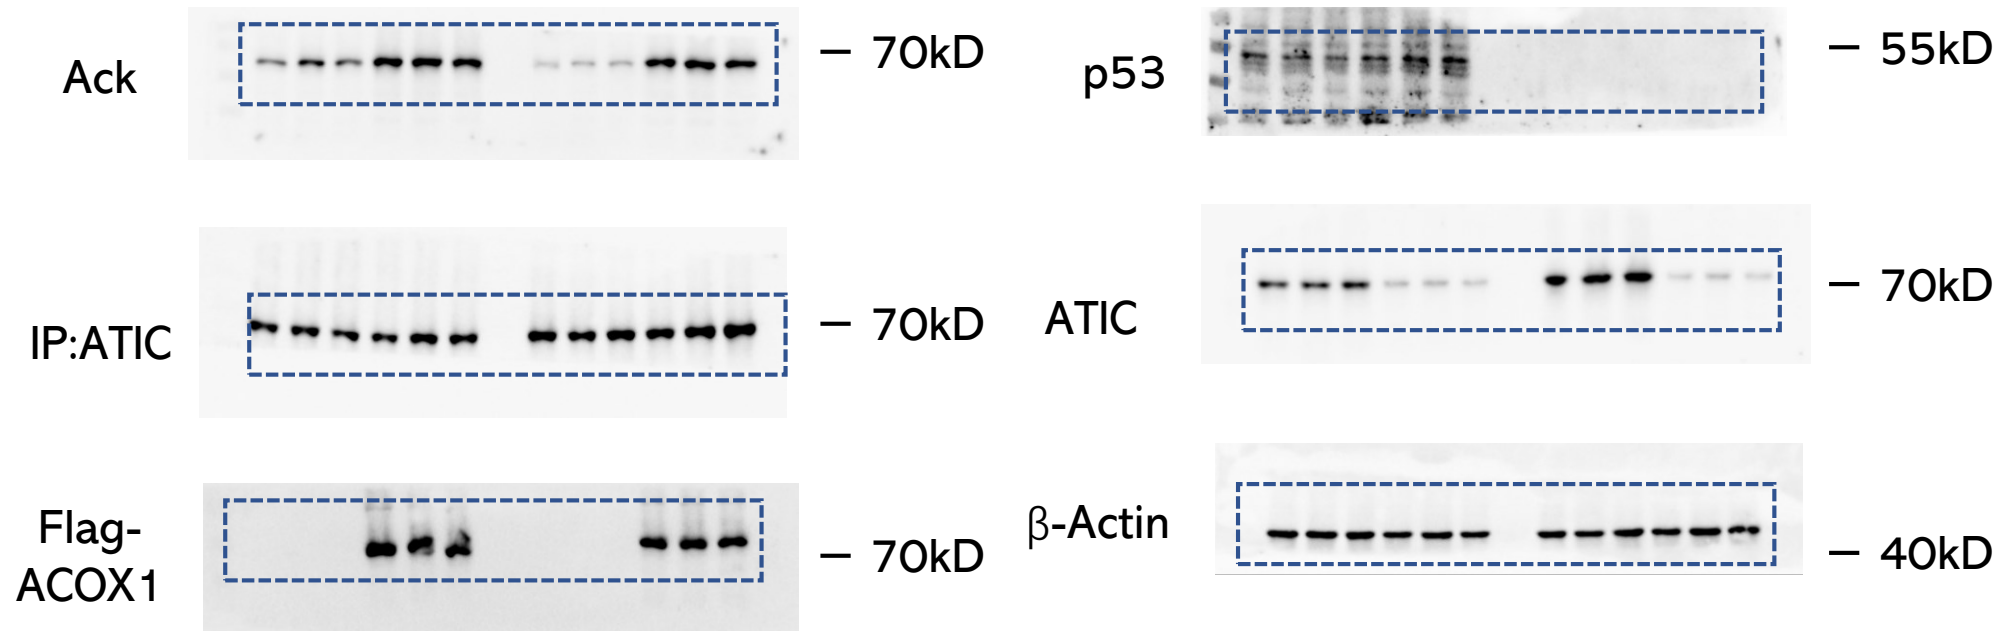

**Fig. S5b**

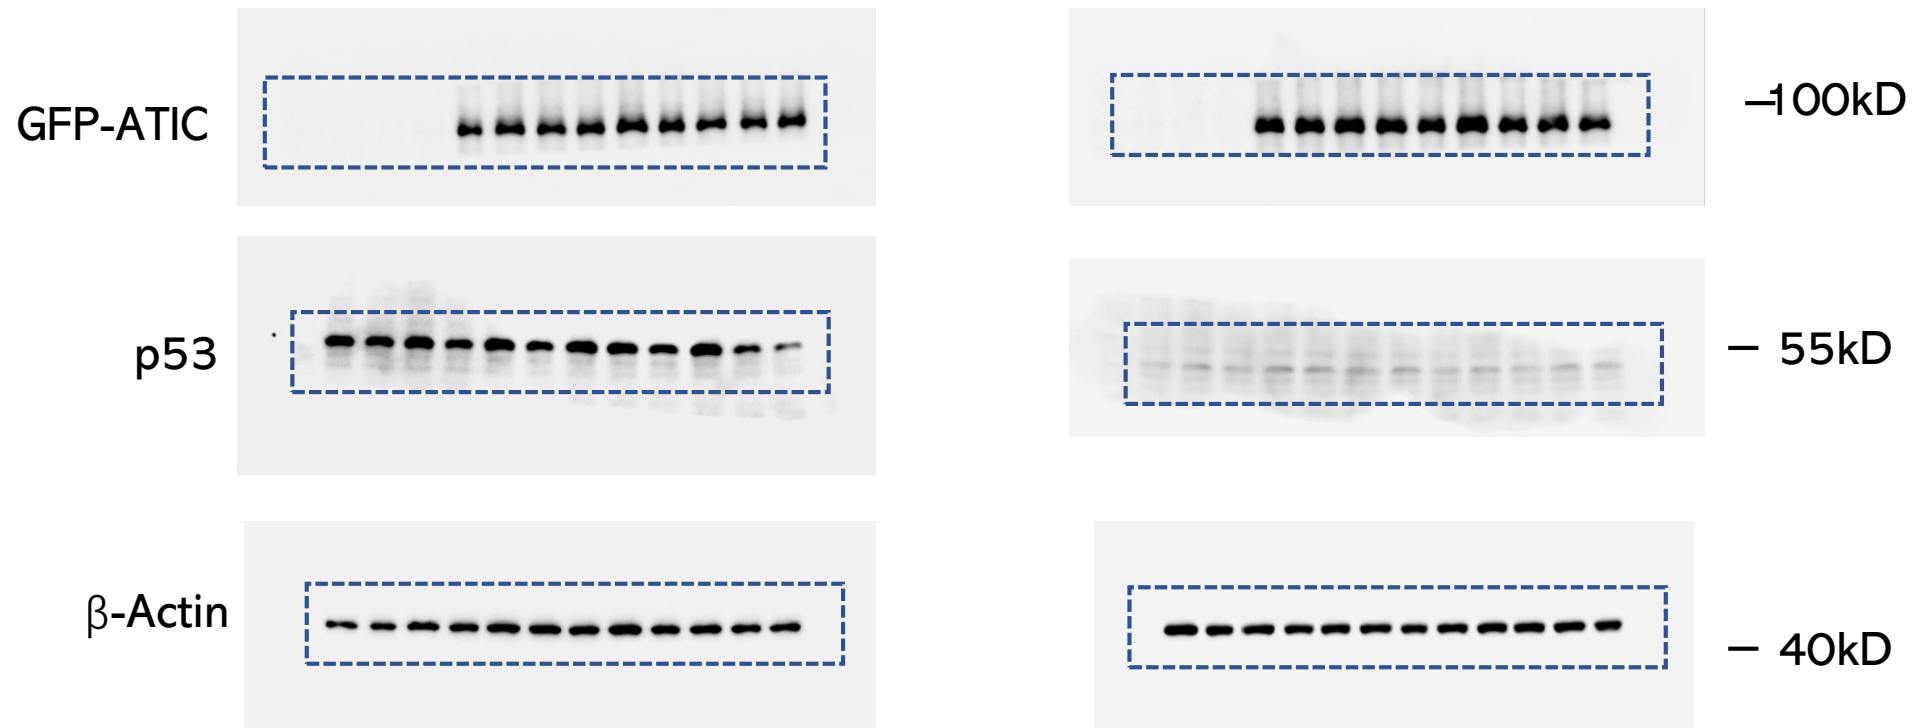

**Fig. S6h**

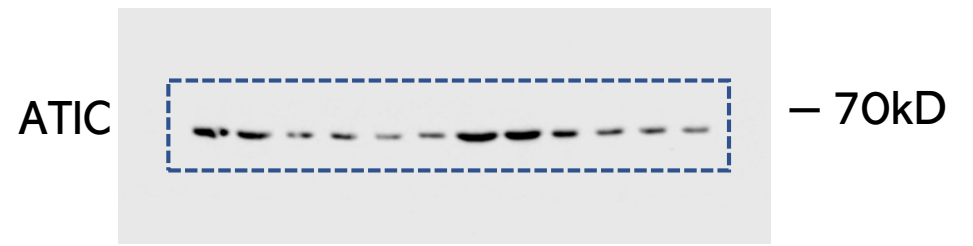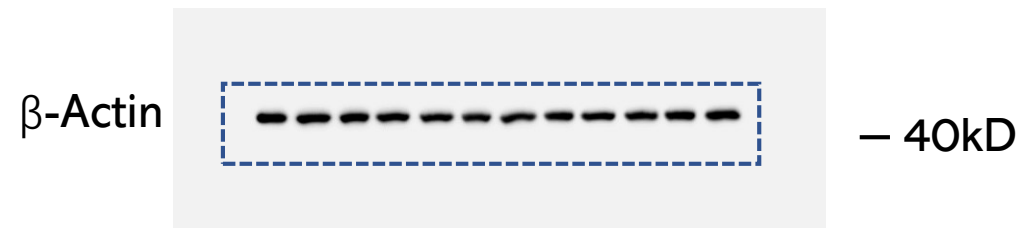

Fig. S7a

p53

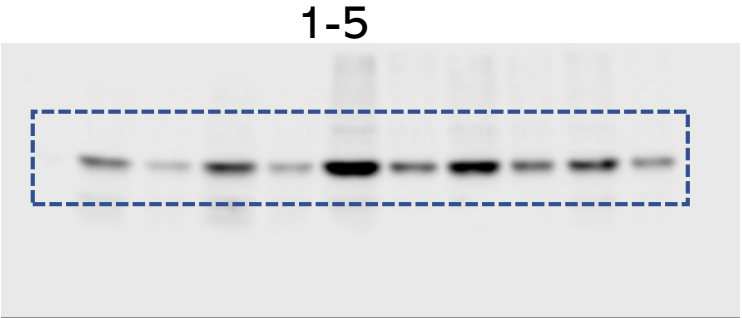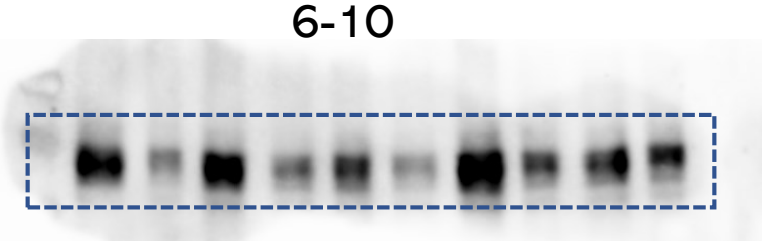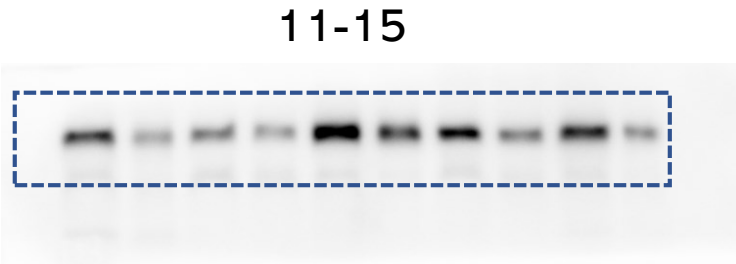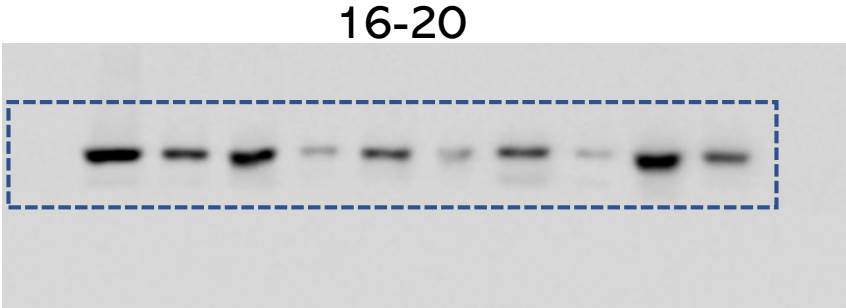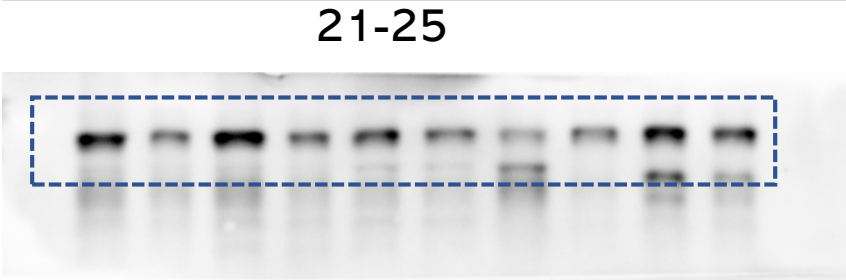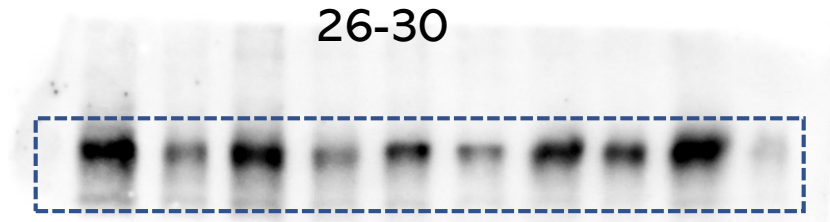

- 55kD

- 55kD

- 55kD

Fig. S7a

ACOX1

1-5

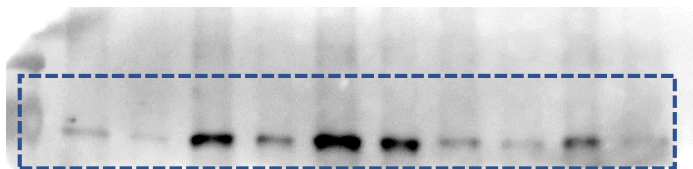

6-10

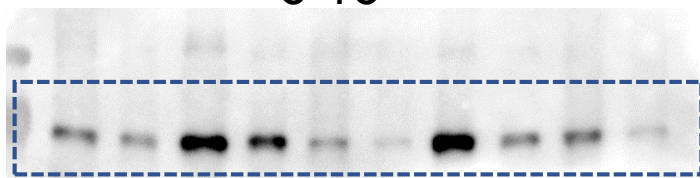

11-15

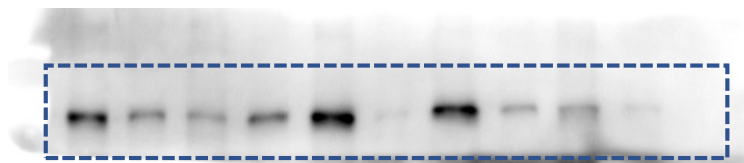

16-20

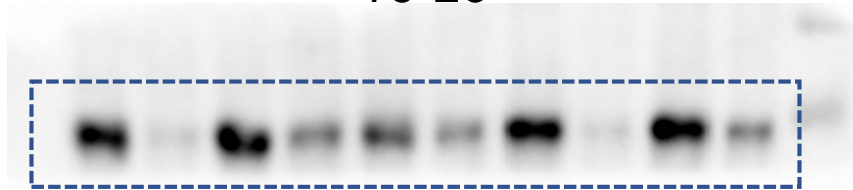

- 70kD

21-25

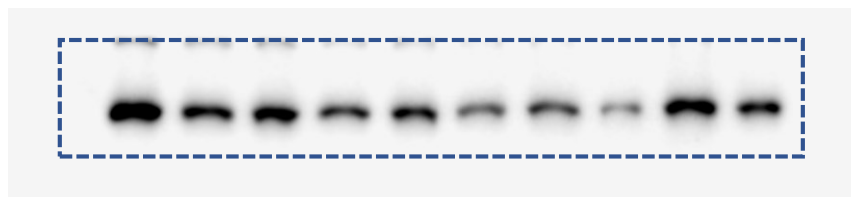

- 70kD

26-30

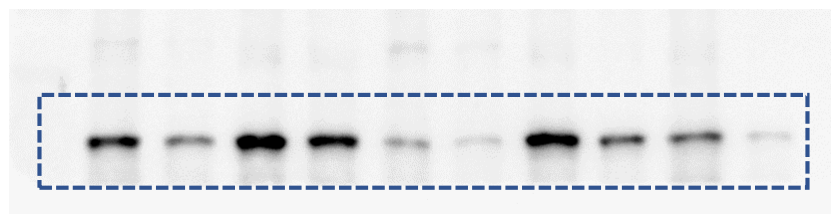

- 70kD

Fig. S7a

KAT2B

1-5

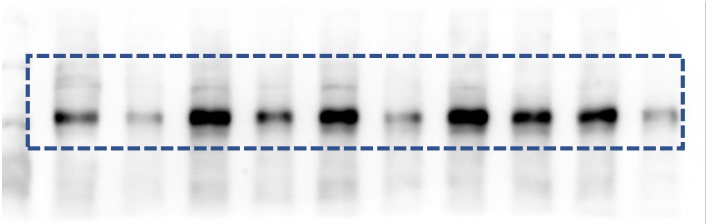

6-10

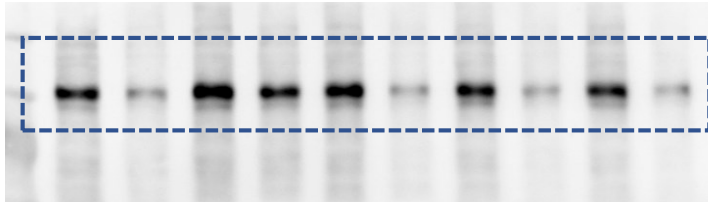

11-15

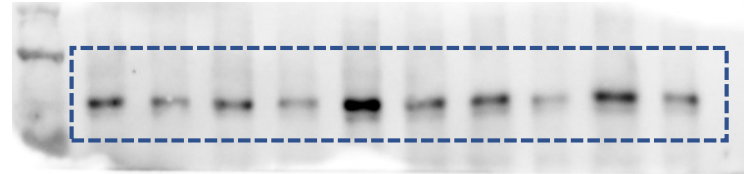

16-20

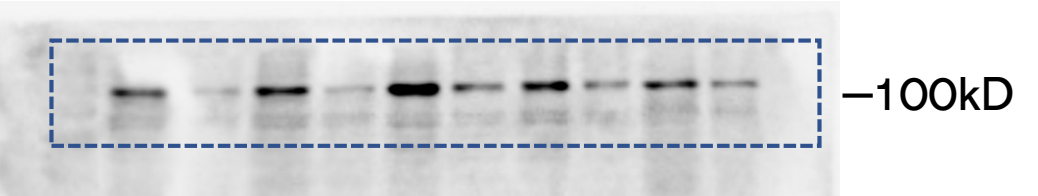

21-25

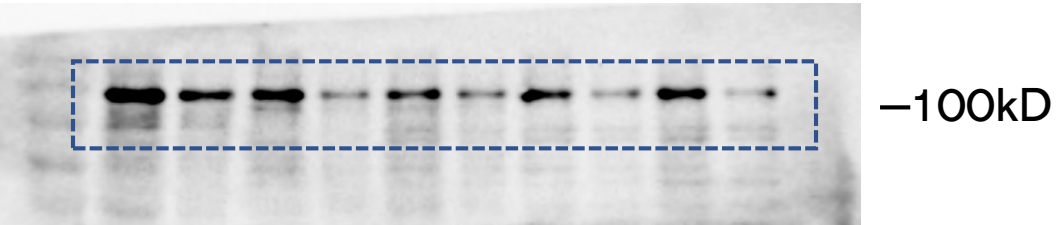

26-30

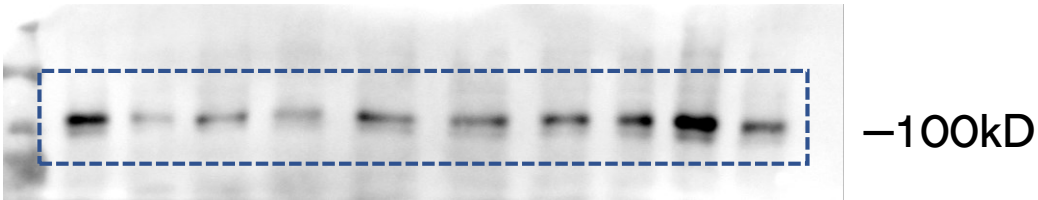



Fig. S7a

ATIC

1-5

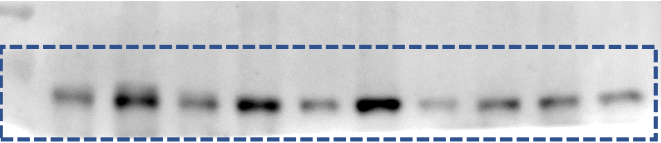

6-10

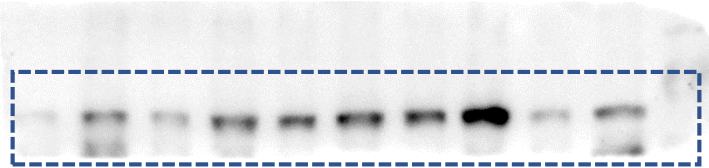

11-15

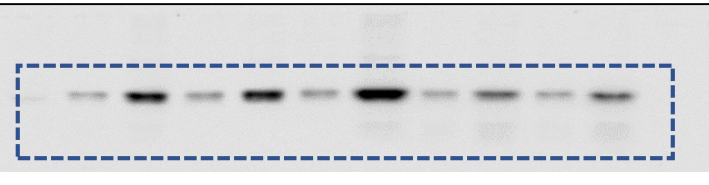

16-20

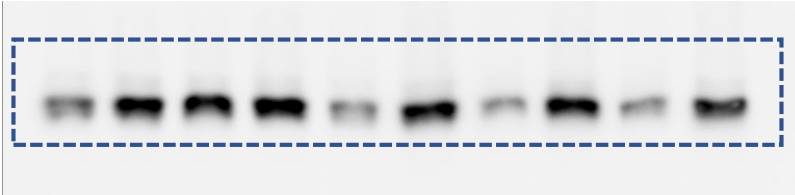

- 70kD

21-25

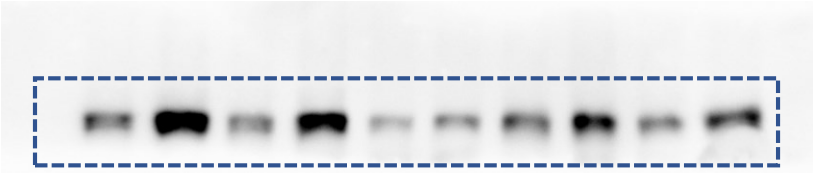

- 70kD

26-30

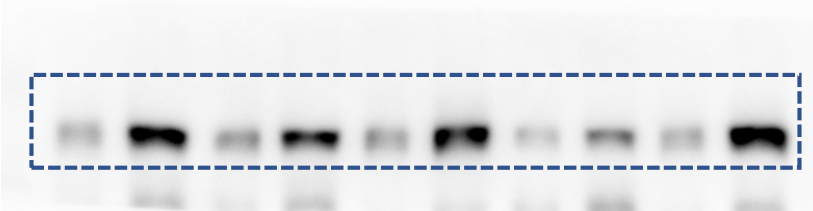

- 70kD

Fig. S7a

Ac-ATIC

1-5

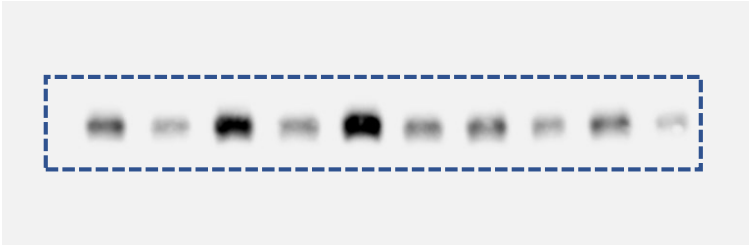

6-10

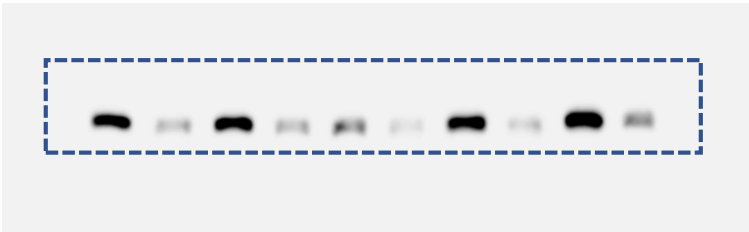

11-15

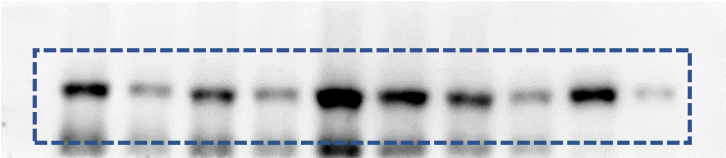

16-20

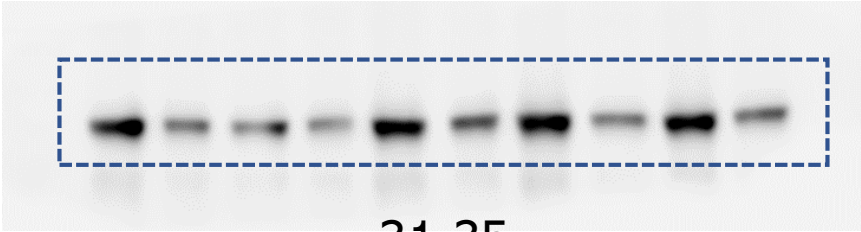

- 70kD

21-25

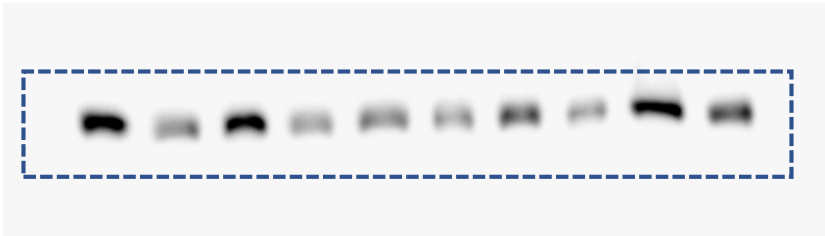

- 70kD

26-30

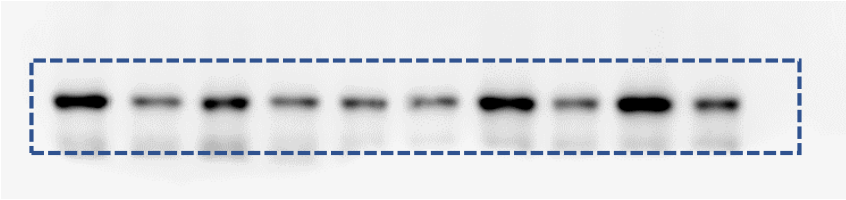

- 70kD

Fig. S7a

IP: ATIC

1-5

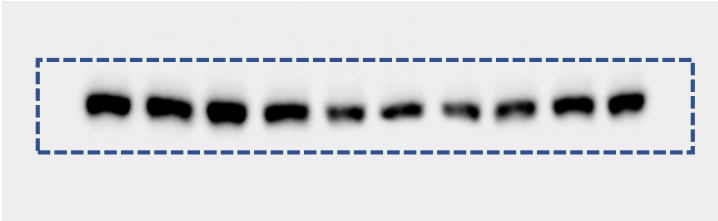

6-10

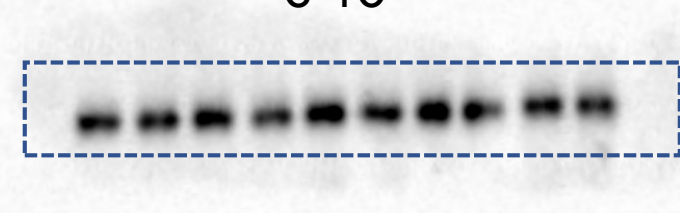

11-15

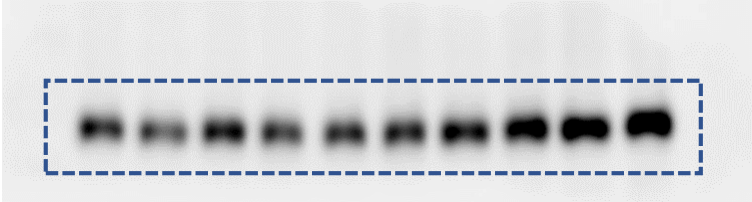

16-20

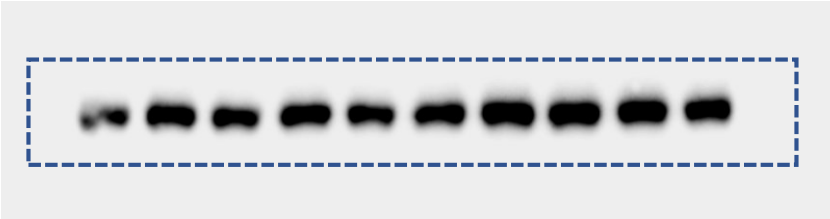

– 70kD

21-25

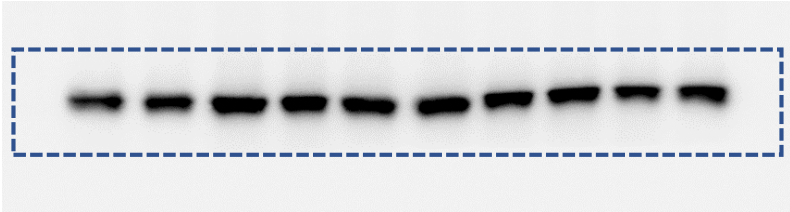

– 70kD

26-30

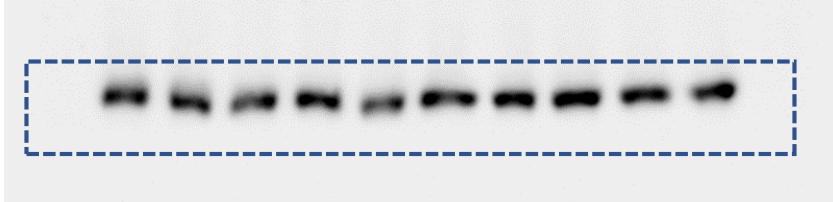

– 70kD

Fig. S7a

Actin

1-5

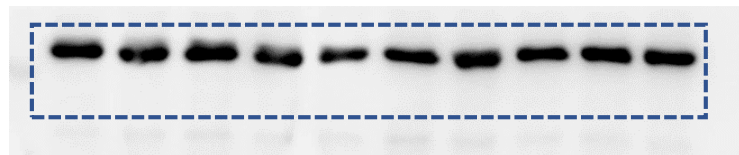

6-10

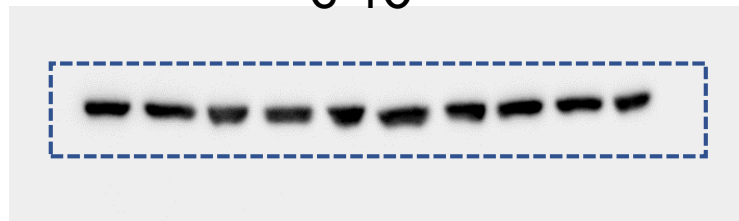

11-15

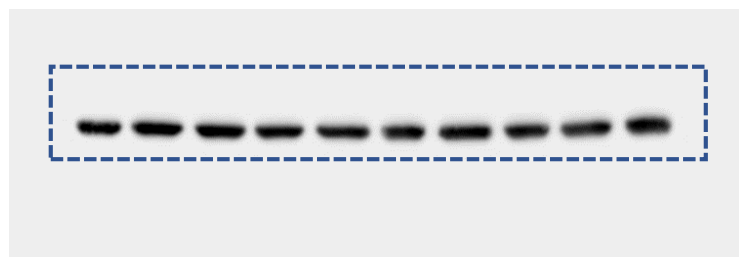

16-20

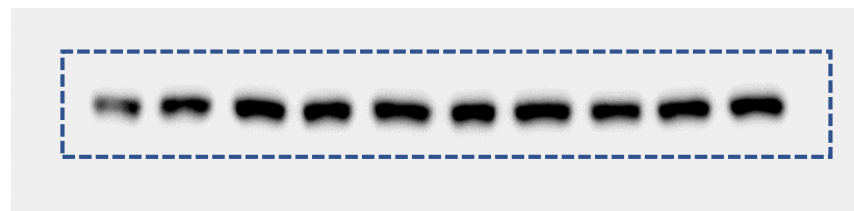

– 40kD

21-25

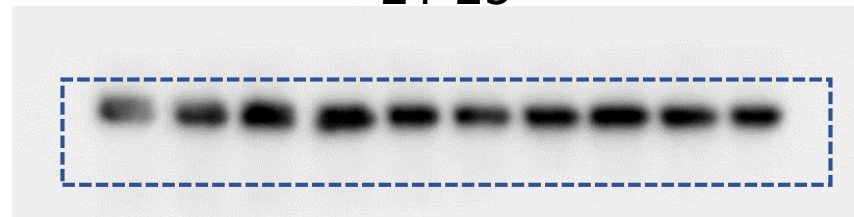

– 40kD

26-30

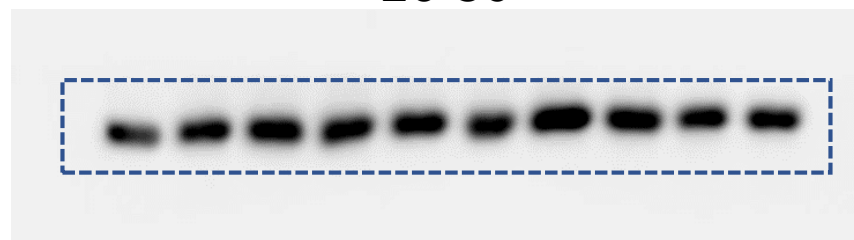

– 40kD
